# Supplementary material for: The Protein Interaction Network of the Human Transcription Machinery Reveals a Role for the Conserved GTPase RPAP4/GPN1 and Microtubule Assembly in Nuclear Import and Biogenesis of RNA Polymerase II
Source: PubMed Central journal article supplement — Mol Cell Proteomics. 2010 Sep 20;9(12):2827–39. doi: 10.1074/mcp.M110.003616 (PMC3002788; doi:10.1074/mcp.m110.003616), 2010-09-20

## Table of contents

### Supplemental Data

#### **Supplemental Table S1**

Detailed mass spectrometry data and IR scores for human TAP interactions.

#### **Supplemental Table S2**

Detailed mass spectrometry data for yeast TAP interactions.

#### **Supplemental Table S3**

Yeast strains and plasmids used in this study.

#### **Supplemental Table S4**

Annotation for human proteins identified on the basis of a single peptide.

#### **Supplemental Table S5**

Annotation for yeast proteins identified on the basis of a single peptide.

#### **Supplemental Figure S1**

Annotated spectra for human proteins identified on the basis of a single peptide.

#### **Supplemental Figure S2**

Annotated spectra for yeast proteins identified on the basis of a single peptide.

#### **Supplemental Figure S3**

Silver-stained gels of TAP eluates.

#### **Supplemental Figure S4**

Localisation of RNAPII subunits by immunofluorescence following treatment with RPAP4 and control siRNA, leptomycin B (LMB) and benomyl.

**Supplemental Table S1**

Detailed mass spectrometry data and IR scores for human TAP interactions. Annotated spectra for proteins identified on the basis of a single peptide are presented in supplemental Table S4 and supplemental Figure S1.

| Bait | Prey          | Accession Number | Unique Peptide Match | Sequence Coverage % | Protein Mascot Score | IR score |
|------|---------------|------------------|----------------------|---------------------|----------------------|----------|
| CCT4 | CCT2          | CAG33352         | 12                   | 29.3                | 630                  | 0.8824   |
| CCT4 | CCT3          | CAI14168         | 14                   | 25.3                | 708                  | 0.8557   |
| CCT4 | CCT5          | AAH02971         | 10                   | 19.3                | 487                  | 0.9342   |
| CCT4 | CCT6A         | BAD92965         | 13                   | 25.1                | 610                  | 0.8458   |
| CCT4 | CCT6B         | Q92526           | 4                    | 6.6                 | 188                  | 0.7654   |
| CCT4 | CCT7          | NP_006420        | 12                   | 27.3                | 638                  | 0.8553   |
| CCT4 | CCT8          | EAX09924         | 15                   | 30.0                | 811                  | 0.8671   |
| CCT4 | HIST1H1E      | ABN72276         | 2                    | 10.5                | 118                  | 0.7566   |
| CCT4 | HSPA6         | BAD97082         | 3                    | 6.7                 | 213                  | 0.8148   |
| CCT4 | TCP1          | CAA37064         | 12                   | 25.4                | 628                  | 0.8331   |
| CCT5 | BAT2D1        | CAB51071         | 12                   | 4.9                 | 556                  | 0.7507   |
| CCT5 | CAND1         | AAH26220         | 2                    | 2.0                 | 145                  | 0.7494   |
| CCT5 | CCT2          | NP_006422        | 28                   | 64.5                | 1890                 | 0.8740   |
| CCT5 | CCT3          | CAI14168         | 20                   | 43.3                | 1142                 | 0.8659   |
| CCT5 | CCT4          | NP_006421        | 30                   | 53.4                | 1678                 | 0.9336   |
| CCT5 | CCT6A         | BAD92965         | 25                   | 48.4                | 1588                 | 0.8824   |
| CCT5 | CCT6B         | Q92526           | 5                    | 9.1                 | 272                  | 0.7613   |
| CCT5 | CCT7          | EAW99740         | 24                   | 58.1                | 1524                 | 0.8993   |
| CCT5 | CCT8          | BAD96210         | 32                   | 54.0                | 2001                 | 0.9062   |
| CCT5 | CKAP5         | NP_055571        | 11                   | 5.9                 | 492                  | 0.7728   |
| CCT5 | DDX42         | EAW94278         | 5                    | 5.9                 | 312                  | 0.7829   |
| CCT5 | EEF1A2        | AAA91835         | 2                    | 4.6                 | 90                   | 0.7414   |
| CCT5 | HNRNPU        | NP_114032        | 13                   | 16.8                | 638                  | 0.7850   |
| CCT5 | INF2          | EAW81874         | 5                    | 5.3                 | 294                  | 0.7720   |
| CCT5 | KHSRP         | AAH85004         | 9                    | 20.3                | 487                  | 0.7750   |
| CCT5 | KPNA2         | AAH67848         | 2                    | 7.9                 | 120                  | 0.8414   |
| CCT5 | LONP1         | AAI09219         | 2                    | 2.6                 | 128                  | 0.7688   |
| CCT5 | PCBP1         | NP_006187        | 4                    | 13.8                | 182                  | 0.7539   |
| CCT5 | PCBP2         | NP_001092090     | 4                    | 16.3                | 180                  | 0.7818   |
| CCT5 | PDCD5         | NP_004699        | 7                    | 46.4                | 378                  | 0.9611   |
| CCT5 | RP11-631M21.2 | EAW69700         | 2                    | 28.6                | 88                   | 0.7351   |
| CCT5 | TCP1          | NP_110379        | 24                   | 44.1                | 1546                 | 0.8830   |
| CCT5 | TUBA1A        | CAA25855         | 18                   | 46.1                | 1132                 | 0.8993   |
| CCT5 | TUBA1B        | NP_035784        | 18                   | 46.1                | 1158                 | 0.7924   |
| CCT5 | TUBA1C        | NP_116093        | 18                   | 46.3                | 1132                 | 0.8097   |
| CCT5 | TUBB3         | AAH01678         | 11                   | 29.6                | 784                  | 0.7792   |
| CCT5 | TUBB6         | NP_080749        | 9                    | 20.4                | 575                  | 0.8173   |
| CCT5 | XPO1          | NP_003391        | 1                    | 1.1                 | 67                   | 0.7444   |
| GPN1 | BAT1          | NP_542165        | 2                    | 5.1                 | 86                   | 0.7525   |
| GPN1 | CCT3          | NP_005989        | 4                    | 7.7                 | 193                  | 0.7872   |
| GPN1 | CCT4          | NP_006421        | 10                   | 23.6                | 479                  | 0.8551   |
| GPN1 | CCT5          | NP_036205        | 2                    | 2.4                 | 80                   | 0.8242   |
| GPN1 | CCT6A         | NP_001753        | 4                    | 7.5                 | 152                  | 0.7946   |
| GPN1 | CCT7          | NP_006420        | 4                    | 11.2                | 263                  | 0.7991   |

|      |           |           |    |      |      |        |
|------|-----------|-----------|----|------|------|--------|
| GPN1 | CCT8      | NP_006576 | 6  | 15.3 | 271  | 0.7775 |
| GPN1 | GPN3      | AAH31024  | 3  | 14.4 | 230  | 0.9571 |
| GPN1 | GRINL1A   | BAC11313  | 3  | 11.1 | 139  | 0.8311 |
| GPN1 | HIST1H2BM | NP_003512 | 2  | 19.0 | 92   | 0.7435 |
| GPN1 | HNRNPU    | NP_004492 | 7  | 13.4 | 312  | 0.7979 |
| GPN1 | HSP90AB1  | NP_031381 | 2  | 3.6  | 105  | 0.7744 |
| GPN1 | HSPA1L    | AAH63507  | 9  | 18.1 | 544  | 0.8052 |
| GPN1 | HSPA8     | NP_006588 | 15 | 25.9 | 763  | 0.8490 |
| GPN1 | KPNA2     | NP_002257 | 1  | 2.8  | 50   | 0.8097 |
| GPN1 | PDRG1     | AAH01856  | 3  | 25.6 | 144  | 0.8120 |
| GPN1 | PFDN2     | AAH47042  | 3  | 22.7 | 207  | 0.8643 |
| GPN1 | PFDN6     | AAH59783  | 5  | 34.1 | 174  | 0.8299 |
| GPN1 | PIH1D1    | NP_060386 | 3  | 11.0 | 154  | 0.8319 |
| GPN1 | POLR1C    | AAH08118  | 6  | 21.3 | 297  | 0.8085 |
| GPN1 | POLR2A    | NP_000928 | 8  | 4.6  | 341  | 0.8417 |
| GPN1 | POLR2B    | AAH23503  | 28 | 24.8 | 1331 | 0.8909 |
| GPN1 | POLR2C    | CAA11843  | 3  | 9.8  | 131  | 0.7860 |
| GPN1 | POLR2D    | AAH14877  | 1  | 17.9 | 69   | 0.7721 |
| GPN1 | POLR2E    | AAH04441  | 10 | 45.2 | 482  | 0.8306 |
| GPN1 | POLR2H    | AAA91458  | 2  | 18.0 | 101  | 0.8194 |
| GPN1 | RPAP1     | NP_056355 | 18 | 12.6 | 812  | 0.9470 |
| GPN1 | RPAP2     | AAH39014  | 6  | 10.1 | 233  | 0.8510 |
| GPN1 | RPAP3     | AAH56415  | 8  | 15.2 | 326  | 0.8894 |
| GPN1 | RUVBL1    | ABF13334  | 5  | 15.0 | 223  | 0.8369 |
| GPN1 | RUVBL2    | Q9WTM5    | 10 | 26.1 | 512  | 0.8298 |
| GPN1 | TCOF1     | NP_000347 | 3  | 3.6  | 116  | 0.7427 |
| GPN1 | TCP1      | NP_110379 | 8  | 17.6 | 339  | 0.8193 |
| GPN1 | TUBA1A    | BAE27586  | 4  | 11.5 | 235  | 0.8456 |
| GPN1 | TUBA1C    | NP_116093 | 5  | 16.0 | 276  | 0.7986 |
| GPN1 | TUBB      | ABE96641  | 2  | 12.0 | 48   | 0.8092 |
| GPN1 | UXT       | CAI42449  | 2  | 21.7 | 74   | 0.8037 |
| GPN1 | WDR92     | BAB71143  | 5  | 13.7 | 142  | 0.7823 |
| GPN1 | XPO1      | NP_003391 | 1  | 1.3  | 38   | 0.7337 |
| GPN2 | ARID3A    | AAW30734  | 2  | 4.6  | 159  | 0.7594 |
| GPN2 | CKAP5     | NP_055571 | 6  | 3.5  | 322  | 0.7542 |
| GPN2 | DDX3Y     | NP_004651 | 2  | 3.2  | 101  | 0.7428 |
| GPN2 | GTF2I     | AAB48826  | 3  | 2.8  | 105  | 0.7416 |
| GPN2 | INF2      | EAH81874  | 6  | 6.6  | 269  | 0.7494 |
| GPN2 | POLR2B    | NP_000929 | 6  | 5.0  | 201  | 0.7782 |
| GPN2 | RPAP1     | EAH92503  | 8  | 6.6  | 385  | 0.7950 |
| GPN3 | GPN1      | EAX00557  | 1  | 4.1  | 89   | 0.8901 |
| GPN3 | HNRNPU    | NP_004492 | 11 | 14.0 | 494  | 0.7528 |
| GPN3 | HSPA6     | BAD97082  | 5  | 9.8  | 286  | 0.7696 |
| GPN3 | POLR1A    | O95602    | 18 | 11.2 | 775  | 0.7766 |
| GPN3 | POLR1C    | CAI42628  | 3  | 12.7 | 156  | 0.7666 |
| GPN3 | POLR2A    | CAA52862  | 8  | 4.9  | 376  | 0.8577 |
| GPN3 | POLR2B    | NP_000929 | 7  | 5.9  | 277  | 0.7917 |
| GPN3 | POLR2C    | NP_116558 | 2  | 8.4  | 107  | 0.7737 |
| GPN3 | POLR2E    | AAH34144  | 4  | 19.5 | 203  | 0.8311 |
| GPN3 | POLR2H    | NP_006223 | 2  | 10.7 | 123  | 0.7951 |
| GPN3 | RPAP2     | EAH73096  | 6  | 10.6 | 218  | 0.8853 |
| GPN3 | TUBA1A    | CAA25855  | 11 | 32.4 | 569  | 0.8131 |

|         |          |              |    |      |      |        |
|---------|----------|--------------|----|------|------|--------|
| GPN3    | TUBB2C   | EAW88369     | 10 | 20.6 | 506  | 0.7685 |
| GPN3    | TUBB3    | BAD96759     | 6  | 20.7 | 301  | 0.7658 |
| GRINL1A | EIF4A2   | AAH15842     | 2  | 5.7  | 123  | 0.7721 |
| GRINL1A | Gcom1    | CAB43263     | 2  | 15.2 | 181  | 0.8535 |
| GRINL1A | POLR2A   | NP_000928    | 5  | 3.0  | 219  | 0.8544 |
| GRINL1A | POLR2B   | AAH23503     | 21 | 19.8 | 971  | 0.7627 |
| GRINL1A | POLR2C   | AAH28157     | 9  | 32.0 | 590  | 0.8333 |
| GRINL1A | POLR2D   | 2C35         | 5  | 32.9 | 259  | 0.8372 |
| GRINL1A | POLR2E   | AAH04441     | 13 | 80.0 | 796  | 0.8116 |
| GRINL1A | POLR2H   | AAA91458     | 6  | 42.0 | 397  | 0.8205 |
| GRINL1A | RPAP2    | AAH39014     | 4  | 7.0  | 151  | 0.8469 |
| HSPA8   | HSPA5    | AAF13605     | 3  | 4.4  | 265  | 0.7983 |
| HSPA8   | TUBA1A   | CAA25855     | 9  | 26.2 | 462  | 0.8245 |
| KPNA2   | ACTB     | BAD96752     | 13 | 31.2 | 793  | 0.8362 |
| KPNA2   | ACTBL2   | NP_001017992 | 5  | 11.7 | 265  | 0.7963 |
| KPNA2   | ACTG1    | AAH17450     | 8  | 23.7 | 415  | 0.8260 |
| KPNA2   | ACTL6A   | NP_004292    | 12 | 35.0 | 685  | 0.8178 |
| KPNA2   | ARID2    | BAB55236     | 2  | 8.5  | 114  | 0.7573 |
| KPNA2   | ARS2     | AAI09118     | 8  | 9.4  | 368  | 0.7534 |
| KPNA2   | C12orf45 | NP_689531    | 9  | 41.1 | 526  | 0.8326 |
| KPNA2   | C17orf49 | NP_777553    | 3  | 20.9 | 232  | 0.7997 |
| KPNA2   | C20orf20 | NP_060740    | 3  | 17.2 | 190  | 0.7528 |
| KPNA2   | CCAR1    | EAW54300     | 12 | 12.7 | 563  | 0.7803 |
| KPNA2   | CD3EAP   | AAI08890     | 3  | 13.2 | 202  | 0.7794 |
| KPNA2   | CDK2AP1  | EAW98399     | 3  | 29.0 | 202  | 0.7991 |
| KPNA2   | CHD4     | NP_001264    | 16 | 9.6  | 818  | 0.8041 |
| KPNA2   | CTDSPL2  | AAH18623     | 3  | 28.0 | 182  | 0.7525 |
| KPNA2   | DPF2     | NP_006259    | 2  | 5.9  | 124  | 0.7717 |
| KPNA2   | GATAD2A  | CAB99095     | 3  | 24.3 | 178  | 0.7477 |
| KPNA2   | GATAD2B  | BAA86464     | 4  | 10.2 | 246  | 0.7413 |
| KPNA2   | HDAC1    | BAA08909     | 5  | 8.5  | 200  | 0.7487 |
| KPNA2   | HDAC2    | EAW48252     | 5  | 10.9 | 286  | 0.8255 |
| KPNA2   | HNRNPC   | EAW66397     | 2  | 12.1 | 100  | 0.7592 |
| KPNA2   | HNRNPU   | AAH07950     | 8  | 14.0 | 274  | 0.8212 |
| KPNA2   | KIFC1    | Q9BW19       | 22 | 35.4 | 1130 | 0.8370 |
| KPNA2   | KPNB1    | NP_002256    | 51 | 61.2 | 3597 | 0.9322 |
| KPNA2   | MBD2     | NP_003918    | 6  | 12.9 | 236  | 0.7584 |
| KPNA2   | MBD3     | NP_003917    | 12 | 38.1 | 693  | 0.8438 |
| KPNA2   | MDC1     | NP_055456    | 4  | 3.0  | 238  | 0.7516 |
| KPNA2   | MTA2     | NP_004730    | 24 | 35.3 | 1275 | 0.8555 |
| KPNA2   | NCBP1    | NP_002477    | 15 | 21.8 | 629  | 0.7799 |
| KPNA2   | NCBP2    | NP_031388    | 12 | 48.7 | 484  | 0.7589 |
| KPNA2   | NHP2L1   | NP_004999    | 2  | 18.8 | 131  | 0.7393 |
| KPNA2   | NOLC1    | AAH06769     | 19 | 22.5 | 961  | 0.8208 |
| KPNA2   | NOP58    | CAB55989     | 4  | 11.3 | 199  | 0.7420 |
| KPNA2   | NUMA1    | AAD16994     | 5  | 18.7 | 231  | 0.8132 |
| KPNA2   | NUP153   | AAH52965     | 14 | 11.4 | 693  | 0.7896 |
| KPNA2   | NUP50    | NP_705931    | 19 | 56.4 | 1295 | 0.8228 |
| KPNA2   | PBRM1    | BAB71210     | 26 | 28.7 | 1233 | 0.8635 |
| KPNA2   | PHAX     | NP_115553    | 6  | 20.1 | 308  | 0.7388 |
| KPNA2   | PHF10    | CAI12317     | 10 | 31.5 | 426  | 0.8105 |
| KPNA2   | POLR1C   | CAI42628     | 2  | 6.4  | 93   | 0.7675 |

|       |           |           |    |      |      |        |
|-------|-----------|-----------|----|------|------|--------|
| KPNA2 | POLR1D    | NP_057056 | 1  | 8.3  | 49   | 0.7451 |
| KPNA2 | POLR1E    | NP_071935 | 1  | 2.1  | 57   | 0.8587 |
| KPNA2 | POLR2E    | AAB19339  | 2  | 39.6 | 86   | 0.8503 |
| KPNA2 | POLR2H    | NP_006223 | 5  | 32.7 | 262  | 0.8074 |
| KPNA2 | POLR2K    | NP_005025 | 1  | 12.1 | 45   | 0.7374 |
| KPNA2 | PSME3     | EAW60891  | 2  | 9.8  | 161  | 0.7933 |
| KPNA2 | RBBP4     | BAD96499  | 14 | 27.8 | 735  | 0.8153 |
| KPNA2 | RBBP7     | CAI41284  | 13 | 25.2 | 677  | 0.8209 |
| KPNA2 | RUVBL1    | BAD96295  | 9  | 27.0 | 559  | 0.8229 |
| KPNA2 | RUVBL2    | NP_006657 | 5  | 12.3 | 365  | 0.7858 |
| KPNA2 | SART3     | NP_055521 | 20 | 23.7 | 1019 | 0.8413 |
| KPNA2 | SMARCA2   | P51531    | 19 | 13.1 | 849  | 0.8091 |
| KPNA2 | SMARCA4   | EAW84167  | 28 | 18.0 | 1347 | 0.8638 |
| KPNA2 | SMARCB1   | CAA76639  | 8  | 25.6 | 421  | 0.7828 |
| KPNA2 | SMARCC1   | AAI17214  | 29 | 23.8 | 1376 | 0.8303 |
| KPNA2 | SMARCC2   | NP_620706 | 33 | 26.8 | 1887 | 0.8446 |
| KPNA2 | SMARCD1   | NP_620710 | 4  | 9.3  | 246  | 0.7832 |
| KPNA2 | SMARCD2   | Q92925    | 8  | 16.0 | 401  | 0.7779 |
| KPNA2 | SMARCD3   | AAS02031  | 4  | 13.0 | 165  | 0.7601 |
| KPNA2 | SMARCE1   | NP_003070 | 11 | 27.0 | 739  | 0.7943 |
| KPNA2 | TAF10     | NP_006275 | 2  | 15.6 | 178  | 0.8638 |
| KPNA2 | TAF1L     | NP_722516 | 3  | 1.8  | 184  | 0.8297 |
| KPNA2 | TAF4      | AAC50901  | 3  | 4.2  | 273  | 0.8223 |
| KPNA2 | TAF5      | EAW49646  | 2  | 3.1  | 111  | 0.7809 |
| KPNA2 | TAF6      | NP_620835 | 5  | 10.3 | 289  | 0.7918 |
| KPNA2 | TAF9      | NP_003178 | 8  | 31.4 | 385  | 0.7765 |
| KPNA2 | TAF9B     | NP_057059 | 7  | 24.3 | 348  | 0.7748 |
| KPNA2 | TBP       | AAI09055  | 2  | 6.9  | 95   | 0.7495 |
| KPNA2 | TUBB      | CAI41893  | 17 | 47.2 | 1128 | 0.8360 |
| KPNA2 | TUBB2A    | NP_001060 | 13 | 34.4 | 825  | 0.8417 |
| KPNA2 | TUBB2C    | EAW88369  | 16 | 42.6 | 973  | 0.8201 |
| KPNA2 | TUBB3     | AAH01678  | 10 | 26.8 | 712  | 0.8305 |
| KPNA2 | TUBB4     | CAA25318  | 11 | 30.0 | 669  | 0.8510 |
| KPNA2 | TUBB6     | EAX01553  | 6  | 17.9 | 303  | 0.7911 |
| PDRG1 | C19orf2   | AAH26184  | 4  | 7.8  | 174  | 0.8142 |
| PDRG1 | HSPA5     | AAF13605  | 4  | 7.4  | 142  | 0.7896 |
| PDRG1 | LONP1     | AAI09219  | 2  | 2.6  | 80   | 0.7427 |
| PDRG1 | PFDN1     | BAD97114  | 5  | 30.3 | 262  | 0.7833 |
| PDRG1 | PFDN2     | AAF36151  | 5  | 46.2 | 262  | 0.9235 |
| PDRG1 | PFDN5     | EAW96684  | 2  | 27.1 | 93   | 0.7492 |
| PDRG1 | PFDN6     | NP_055075 | 11 | 58.1 | 472  | 0.9525 |
| PDRG1 | PIH1D1    | NP_060386 | 3  | 12.8 | 123  | 0.8543 |
| PDRG1 | POLR2E    | EAW69550  | 4  | 33.3 | 212  | 0.8105 |
| PDRG1 | RPAP3     | AAH56415  | 8  | 13.0 | 415  | 0.9110 |
| PDRG1 | RUVBL1    | BAD96295  | 5  | 15.1 | 383  | 0.8075 |
| PDRG1 | RUVBL2    | AAD34041  | 5  | 11.8 | 296  | 0.7915 |
| PDRG1 | SNRPD3    | NP_004166 | 2  | 15.1 | 113  | 0.7676 |
| PDRG1 | UXT       | NP_004173 | 4  | 21.7 | 259  | 0.9469 |
| PFDN2 | C19orf2   | AAH26184  | 4  | 8.6  | 207  | 0.8543 |
| PFDN2 | HNRNPA2B1 | NP_112533 | 2  | 8.8  | 154  | 0.8225 |
| PFDN2 | HNRNPU    | AAH07950  | 3  | 4.5  | 139  | 0.7891 |
| PFDN2 | KIN       | NP_036443 | 2  | 2.0  | 90   | 0.7827 |

|        |               |           |    |      |      |        |
|--------|---------------|-----------|----|------|------|--------|
| PFDN2  | PDRG1         | AAH01856  | 2  | 20.2 | 153  | 0.9555 |
| PFDN2  | PFDN1         | BAD97114  | 11 | 61.5 | 638  | 0.8167 |
| PFDN2  | PFDN4         | AAB17063  | 6  | 45.4 | 429  | 0.9337 |
| PFDN2  | PFDN5         | NP_002615 | 11 | 69.5 | 890  | 0.8907 |
| PFDN2  | PFDN6         | NP_055075 | 21 | 74.4 | 1130 | 0.9371 |
| PFDN2  | PIH1D1        | NP_060386 | 2  | 7.6  | 88   | 0.8279 |
| PFDN2  | POLR2E        | AAB19339  | 2  | 39.6 | 76   | 0.7645 |
| PFDN2  | RPAP3         | AAH56415  | 6  | 13.3 | 251  | 0.8366 |
| PFDN2  | RUVBL1        | BAD96295  | 3  | 9.6  | 178  | 0.8348 |
| PFDN2  | RUVBL2        | AAD34041  | 2  | 4.3  | 104  | 0.8325 |
| PFDN2  | TUBA1B        | NP_035784 | 8  | 26.8 | 581  | 0.8109 |
| PFDN2  | TUBB          | CAI41893  | 8  | 24.9 | 347  | 0.8058 |
| PFDN2  | TUBB2C        | EAW88369  | 6  | 17.4 | 241  | 0.8034 |
| PFDN2  | UXT           | NP_004173 | 4  | 22.9 | 246  | 0.9406 |
| PFDN2  | VBP1          | AAC50617  | 16 | 44.0 | 828  | 0.8313 |
| PFDN6  | C19orf2       | NP_003787 | 26 | 41.7 | 1483 | 0.9080 |
| PFDN6  | CCT2          | CAG33352  | 2  | 6.0  | 115  | 0.7942 |
| PFDN6  | HNRNPD        | BAA09524  | 2  | 10.2 | 80   | 0.7340 |
| PFDN6  | HSPA2         | NP_068814 | 4  | 7.8  | 198  | 0.7699 |
| PFDN6  | HSPA5         | AAF13605  | 2  | 3.1  | 99   | 0.7885 |
| PFDN6  | KIN           | NP_036443 | 2  | 2.0  | 120  | 0.7825 |
| PFDN6  | PDRG1         | AAH01856  | 7  | 49.6 | 462  | 0.9629 |
| PFDN6  | PFDN1         | NP_002613 | 19 | 88.5 | 1017 | 0.8270 |
| PFDN6  | PFDN2         | NP_036526 | 15 | 77.3 | 1003 | 0.9521 |
| PFDN6  | PFDN4         | AAB17063  | 12 | 59.2 | 836  | 0.9554 |
| PFDN6  | PFDN5         | NP_002615 | 10 | 59.7 | 793  | 0.8807 |
| PFDN6  | PIH1D1        | AAH01108  | 6  | 30.7 | 389  | 0.9267 |
| PFDN6  | POLR2E        | NP_002686 | 9  | 41.4 | 422  | 0.8489 |
| PFDN6  | RP11-631M21.2 | EAW69700  | 2  | 28.6 | 95   | 0.7840 |
| PFDN6  | RPAP3         | EAW57937  | 35 | 49.6 | 1846 | 0.9340 |
| PFDN6  | RUVBL1        | BAD96295  | 9  | 27.9 | 647  | 0.7928 |
| PFDN6  | RUVBL2        | NP_006657 | 9  | 19.9 | 656  | 0.8374 |
| PFDN6  | TUBA1A        | CAA25855  | 12 | 33.7 | 788  | 0.8438 |
| PFDN6  | TUBA1B        | NP_035784 | 12 | 33.7 | 834  | 0.8193 |
| PFDN6  | TUBA1C        | NP_116093 | 8  | 28.1 | 480  | 0.8010 |
| PFDN6  | TUBA4B        | EAW70721  | 2  | 16.6 | 137  | 0.7801 |
| PFDN6  | TUBB          | CAI41893  | 12 | 27.5 | 783  | 0.8203 |
| PFDN6  | TUBB2A        | NP_001060 | 9  | 2.2  | 562  | 0.8235 |
| PFDN6  | TUBB2C        | EAW88369  | 12 | 24.3 | 724  | 0.8162 |
| PFDN6  | UXT           | NP_004173 | 3  | 17.2 | 191  | 0.9329 |
| PFDN6  | VBP1          | P61758    | 26 | 68.5 | 1380 | 0.8581 |
| PFDN6  | WDR92         | NP_612467 | 9  | 26.3 | 364  | 0.8906 |
| PIH1D1 | C19orf2       | NP_003787 | 12 | 19.4 | 702  | 0.8745 |
| PIH1D1 | HSPA5         | AAF13605  | 2  | 3.1  | 99   | 0.7871 |
| PIH1D1 | PDRG1         | AAH01856  | 3  | 30.2 | 172  | 0.8340 |
| PIH1D1 | PFDN2         | AAF36151  | 4  | 39.6 | 192  | 0.9283 |
| PIH1D1 | PFDN6         | NP_055075 | 9  | 64.3 | 429  | 0.8715 |
| PIH1D1 | POLR2E        | NP_002686 | 10 | 41.4 | 406  | 0.8101 |
| PIH1D1 | RP11-631M21.2 | EAW69700  | 2  | 28.6 | 72   | 0.7619 |
| PIH1D1 | RPAP3         | EAW57937  | 32 | 51.4 | 1675 | 0.9014 |
| PIH1D1 | RUVBL1        | BAD96295  | 10 | 30.9 | 702  | 0.7701 |
| PIH1D1 | RUVBL2        | NP_006657 | 8  | 19.2 | 560  | 0.8321 |

|        |          |              |     |      |      |        |
|--------|----------|--------------|-----|------|------|--------|
| PIH1D1 | TUBA1A   | CAA25855     | 6   | 20.8 | 384  | 0.8133 |
| PIH1D1 | UXT      | NP_004173    | 3   | 24.2 | 214  | 0.9348 |
| PIH1D1 | WDR92    | NP_612467    | 9   | 26.3 | 456  | 0.8608 |
| POLR1E | ARF6     | AAV38671     | 2   | 12.0 | 124  | 0.7364 |
| POLR1E | ARID3A   | AAW30734     | 11  | 26.1 | 609  | 0.8097 |
| POLR1E | CAND1    | AAH26220     | 4   | 3.9  | 216  | 0.7550 |
| POLR1E | CD3EAP   | NP_036231    | 16  | 40.8 | 841  | 0.7987 |
| POLR1E | GCN1L1   | NP_006827    | 17  | 7.8  | 932  | 0.8018 |
| POLR1E | HSPA5    | AAF13605     | 2   | 3.1  | 75   | 0.7539 |
| POLR1E | HSPA6    | BAD97082     | 5   | 9.8  | 277  | 0.7770 |
| POLR1E | IPO5     | EAX08979     | 4   | 4.7  | 159  | 0.7363 |
| POLR1E | KPNA2    | AAH67848     | 5   | 9.6  | 229  | 0.8909 |
| POLR1E | KPNB1    | EAW94809     | 2   | 3.2  | 107  | 0.7656 |
| POLR1E | PARP1    | EAW69785     | 4   | 4.7  | 266  | 0.7515 |
| POLR1E | PCBP2    | NP_001092090 | 4   | 16.3 | 254  | 0.7823 |
| POLR1E | PHGDH    | AAD51414     | 5   | 14.1 | 326  | 0.7816 |
| POLR1E | POLR1A   | NP_056240    | 104 | 61.6 | 5345 | 0.9757 |
| POLR1E | POLR1B   | AAI10834     | 44  | 40.4 | 2274 | 0.8897 |
| POLR1E | POLR1C   | AAH08118     | 12  | 42.9 | 689  | 0.8199 |
| POLR1E | POLR1D   | NP_057056    | 3   | 32.3 | 192  | 0.8099 |
| POLR1E | POLR2E   | NP_002686    | 10  | 41.9 | 487  | 0.8362 |
| POLR1E | POLR2H   | NP_006223    | 6   | 41.3 | 371  | 0.8030 |
| POLR1E | POLR2L   | NP_066951    | 2   | 29.9 | 84   | 0.7362 |
| POLR1E | POLR3A   | NP_008986    | 2   | 1.3  | 80   | 0.7404 |
| POLR1E | TUBA1A   | CAA25855     | 16  | 39.0 | 957  | 0.8173 |
| POLR1E | TUBB     | CAI41893     | 17  | 43.2 | 1095 | 0.7904 |
| POLR1E | TUBB1    | NP_110400    | 5   | 15.5 | 240  | 0.7358 |
| POLR1E | TUBB2A   | NP_001060    | 13  | 28.5 | 749  | 0.8143 |
| POLR1E | TUBB2C   | AAN87335     | 17  | 41.3 | 1074 | 0.7867 |
| POLR1E | TUBB3    | AAH01678     | 11  | 28.1 | 743  | 0.7919 |
| POLR1E | TUBB4    | CAA25318     | 12  | 26.4 | 722  | 0.8058 |
| POLR1E | TWISTNB  | NP_001002926 | 7   | 21.9 | 306  | 0.8807 |
| POLR2A | BAG2     | NP_004273    | 8   | 48.8 | 437  | 0.7663 |
| POLR2A | C19orf2  | AAD08679     | 5   | 12.4 | 232  | 0.8214 |
| POLR2A | CCT2     | AAB67249     | 2   | 12.4 | 134  | 0.8120 |
| POLR2A | CCT4     | NP_006421    | 4   | 7.4  | 187  | 0.8307 |
| POLR2A | CTDP1    | Q9Y5B0       | 40  | 45.4 | 2175 | 0.8996 |
| POLR2A | DDX26B   | CAI56763     | 6   | 6.7  | 307  | 0.7704 |
| POLR2A | DNAJA1   | AAO31694     | 6   | 23.9 | 257  | 0.7584 |
| POLR2A | GPN1     | EAX00557     | 2   | 7.4  | 136  | 0.8988 |
| POLR2A | GRINL1A  | NP_056347    | 20  | 60.6 | 997  | 0.9741 |
| POLR2A | GTF2B    | AAB23144     | 22  | 70.7 | 1493 | 0.8931 |
| POLR2A | GTF2F1   | CAG33079     | 22  | 36.6 | 1340 | 0.8823 |
| POLR2A | GTF2F2   | NP_004119    | 22  | 85.9 | 1259 | 0.8789 |
| POLR2A | HSP90AB1 | NP_031381    | 10  | 18.4 | 537  | 0.7999 |
| POLR2A | HSPA1A   | AAA52697     | 19  | 34.5 | 957  | 0.8579 |
| POLR2A | HSPA1B   | P08107       | 37  | 59.9 | 2244 | 0.8575 |
| POLR2A | HSPA1L   | BAA32521     | 16  | 27.8 | 1128 | 0.8463 |
| POLR2A | HSPA2    | NP_068814    | 2   | 4.2  | 54   | 0.7520 |
| POLR2A | HSPA6    | BAD97082     | 12  | 16.5 | 704  | 0.8389 |
| POLR2A | HSPA8    | NP_006588    | 34  | 46.9 | 2065 | 0.9102 |
| POLR2A | HSPA9    | BAD96478     | 3   | 4.1  | 112  | 0.7465 |

|        |               |              |    |      |      |        |
|--------|---------------|--------------|----|------|------|--------|
| POLR2A | INTS1         | AAF99604     | 6  | 21.6 | 329  | 0.8794 |
| POLR2A | INTS3         | NP_075391    | 27 | 37.1 | 1341 | 0.9004 |
| POLR2A | INTS4         | NP_291025    | 11 | 14.1 | 713  | 0.8366 |
| POLR2A | INTS5         | NP_085131    | 17 | 26.0 | 992  | 0.8614 |
| POLR2A | INTS6         | NP_001035026 | 18 | 25.1 | 905  | 0.8144 |
| POLR2A | INTS7         | EAW93406     | 21 | 26.9 | 1038 | 0.8668 |
| POLR2A | INTS9         | EAW63505     | 2  | 5.0  | 153  | 0.7640 |
| POLR2A | KIAA1967      | NP_066997    | 23 | 30.0 | 1298 | 0.8381 |
| POLR2A | KPNA2         | AAH67848     | 1  | 3.8  | 79   | 0.8328 |
| POLR2A | MATR3         | NP_061322    | 10 | 17.2 | 329  | 0.7861 |
| POLR2A | MED15         | CAH10580     | 2  | 11.6 | 136  | 0.7859 |
| POLR2A | MED24         | NP_001072986 | 10 | 15.1 | 580  | 0.8043 |
| POLR2A | MED27         | AAF37290     | 3  | 13.6 | 168  | 0.7513 |
| POLR2A | MED30         | NP_542382    | 3  | 16.3 | 150  | 0.7347 |
| POLR2A | MED4          | AAF37289     | 3  | 14.8 | 145  | 0.7478 |
| POLR2A | MED8          | NP_963836    | 6  | 37.3 | 287  | 0.8377 |
| POLR2A | OBFC2B        | NP_076973    | 4  | 32.7 | 249  | 0.7884 |
| POLR2A | PDRG1         | AAH01856     | 4  | 41.1 | 227  | 0.8810 |
| POLR2A | PFDN2         | NP_036526    | 5  | 42.2 | 245  | 0.8551 |
| POLR2A | PFDN6         | NP_055075    | 5  | 33.3 | 162  | 0.7738 |
| POLR2A | PIH1D1        | AAH01108     | 7  | 36.6 | 368  | 0.9439 |
| POLR2A | POLR2B        | NP_000929    | 81 | 68.5 | 5202 | 0.9006 |
| POLR2A | POLR2C        | NP_116558    | 20 | 68.4 | 1428 | 0.8907 |
| POLR2A | POLR2D        | NP_004796    | 14 | 83.8 | 972  | 0.8785 |
| POLR2A | POLR2E        | NP_002686    | 17 | 72.9 | 1084 | 0.7648 |
| POLR2A | POLR2F        | NP_068809    | 5  | 15.7 | 185  | 0.7600 |
| POLR2A | POLR2G        | NP_002687    | 12 | 85.5 | 873  | 0.9732 |
| POLR2A | POLR2H        | NP_006223    | 11 | 73.3 | 743  | 0.8717 |
| POLR2A | POLR2I        | NP_006224    | 7  | 77.6 | 506  | 0.8393 |
| POLR2A | PPP2R1A       | 2NYL         | 5  | 12.7 | 273  | 0.7906 |
| POLR2A | PPP2R1B       | NP_002707    | 3  | 9.2  | 201  | 0.7679 |
| POLR2A | RECQL5        | AAH63440     | 16 | 19.9 | 611  | 0.7612 |
| POLR2A | RFC2          | NP_002905    | 2  | 10.6 | 152  | 0.7547 |
| POLR2A | RFC3          | NP_853536    | 2  | 8.5  | 121  | 0.7880 |
| POLR2A | RFC4          | EAW78171     | 3  | 13.2 | 151  | 0.7791 |
| POLR2A | RP11-631M21.2 | EAW69700     | 2  | 28.6 | 88   | 0.8496 |
| POLR2A | RPAP2         | EAW73096     | 8  | 18.8 | 479  | 0.9372 |
| POLR2A | RPAP3         | NP_078880    | 27 | 48.0 | 1304 | 0.9514 |
| POLR2A | RPL23         | AAH03518     | 3  | 28.4 | 161  | 0.8254 |
| POLR2A | RPRD1A        | NP_060640    | 24 | 71.2 | 1488 | 0.8500 |
| POLR2A | RPRD1B        | AAH01696     | 9  | 37.7 | 637  | 0.8245 |
| POLR2A | RUVBL1        | BAD96295     | 14 | 40.8 | 784  | 0.8273 |
| POLR2A | RUVBL2        | NP_006657    | 12 | 26.8 | 730  | 0.8296 |
| POLR2A | TCEA2         | CAD11900     | 6  | 19.6 | 234  | 0.8952 |
| POLR2A | TUBA1A        | CAA25855     | 28 | 63.9 | 1870 | 0.9172 |
| POLR2A | TUBA1B        | XP_001107503 | 30 | 69.5 | 1977 | 0.8704 |
| POLR2A | TUBA4B        | EAW70721     | 3  | 16.6 | 215  | 0.8115 |
| POLR2A | TUBB          | AAN87335     | 31 | 75.7 | 2117 | 0.8293 |
| POLR2A | TUBB2A        | NP_001060    | 26 | 57.8 | 1763 | 0.8842 |
| POLR2A | TUBB2C        | AAH24038     | 32 | 75.7 | 2137 | 0.8396 |
| POLR2A | TUBB3         | NP_006077    | 16 | 33.1 | 1184 | 0.8443 |
| POLR2A | TUBB4         | NP_006078    | 25 | 63.5 | 1537 | 0.8449 |



|        |               |              |    |      |      |        |
|--------|---------------|--------------|----|------|------|--------|
| POLR2A | TUBB6         | EAX01553     | 9  | 20.3 | 514  | 0.8087 |
| POLR2A | UXT           | NP_004173    | 5  | 26.1 | 267  | 0.8646 |
| POLR2A | WDR92         | NP_612467    | 7  | 28.6 | 303  | 0.8436 |
| POLR2E | ARID3A        | AAW30734     | 4  | 10.7 | 111  | 0.7408 |
| POLR2E | C19orf2       | NP_003787    | 29 | 53.6 | 1493 | 0.9123 |
| POLR2E | CAND1         | AAH26220     | 5  | 5.5  | 256  | 0.7859 |
| POLR2E | CKAP5         | NP_055571    | 27 | 16.1 | 1474 | 0.8613 |
| POLR2E | DDX5          | CAE11890     | 2  | 4.9  | 87   | 0.7543 |
| POLR2E | EIF4A1        | NP_001407    | 5  | 15.3 | 192  | 0.7577 |
| POLR2E | GTF2I         | CAA75163     | 17 | 19.1 | 735  | 0.8186 |
| POLR2E | HNRNPU        | AAH15782     | 11 | 17.7 | 500  | 0.8093 |
| POLR2E | HSP90AA1      | AAI08696     | 5  | 9.6  | 234  | 0.7974 |
| POLR2E | HSP90AB1      | AAF82792     | 4  | 7.8  | 195  | 0.8053 |
| POLR2E | HSPA1A        | AAA52697     | 30 | 45.6 | 1652 | 0.8865 |
| POLR2E | HSPA1B        | P08107       | 30 | 45.6 | 1652 | 0.8720 |
| POLR2E | HSPA8         | NP_006588    | 8  | 12.5 | 353  | 0.8498 |
| POLR2E | IPO5          | EAX08979     | 4  | 5.0  | 161  | 0.7707 |
| POLR2E | PCBP1         | NP_006187    | 5  | 18.0 | 272  | 0.7960 |
| POLR2E | PCBP2         | 2AXY         | 3  | 43.8 | 155  | 0.8062 |
| POLR2E | PDRG1         | AAH01856     | 7  | 55.0 | 405  | 0.9694 |
| POLR2E | PFDN2         | NP_036526    | 12 | 71.4 | 720  | 0.9296 |
| POLR2E | PFDN6         | NP_055075    | 17 | 74.4 | 840  | 0.9484 |
| POLR2E | PHGDH         | CAI22213     | 7  | 17.4 | 335  | 0.7868 |
| POLR2E | PIH1D1        | AAH01108     | 17 | 69.0 | 953  | 0.9490 |
| POLR2E | PTBP1         | EAW61158     | 4  | 13.6 | 135  | 0.7438 |
| POLR2E | RP11-631M21.2 | EAW69700     | 2  | 28.6 | 86   | 0.8100 |
| POLR2E | RPAP3         | EAW57937     | 53 | 71.7 | 2705 | 0.9599 |
| POLR2E | RUVBL1        | BAD96295     | 18 | 45.6 | 1200 | 0.8115 |
| POLR2E | RUVBL2        | NP_006657    | 30 | 55.1 | 1971 | 0.8721 |
| POLR2E | SMARCA4       | EAW84167     | 4  | 2.7  | 182  | 0.7733 |
| POLR2E | TRIP12        | EAW70907     | 2  | 2.0  | 111  | 0.7714 |
| POLR2E | TUBA4B        | EAW70721     | 2  | 5.8  | 161  | 0.8212 |
| POLR2E | TUBB2A        | NP_001060    | 10 | 32.8 | 495  | 0.8434 |
| POLR2E | TUBB4         | CAA25318     | 13 | 32.0 | 785  | 0.8581 |
| POLR2E | TUBB4Q        | EAX04599     | 3  | 14.1 | 157  | 0.7411 |
| POLR2E | UXT           | NP_004173    | 10 | 44.6 | 547  | 0.9405 |
| POLR2E | WDR92         | NP_612467    | 17 | 51.5 | 985  | 0.9284 |
| POLR2E | XPO1          | NP_003391    | 2  | 2.1  | 106  | 0.7627 |
| POLR2G | CCT4          | NP_006421    | 3  | 4.1  | 92   | 0.7501 |
| POLR2G | CKAP5         | NP_055571    | 21 | 11.0 | 973  | 0.8052 |
| POLR2G | GCN1L1        | EAW98168     | 13 | 6.6  | 671  | 0.7842 |
| POLR2G | GRINL1A       | BAD97291     | 4  | 12.5 | 187  | 0.7975 |
| POLR2G | HNRNPU        | CAA46472     | 5  | 6.9  | 245  | 0.7594 |
| POLR2G | KPNB1         | EAW94809     | 3  | 4.3  | 156  | 0.7603 |
| POLR2G | MAP2K2        | NP_109587    | 3  | 7.2  | 125  | 0.7441 |
| POLR2G | PCBP2         | NP_001092090 | 2  | 7.3  | 116  | 0.7666 |
| POLR2G | POLR2A        | NP_000928    | 72 | 37.0 | 3591 | 0.9389 |
| POLR2G | POLR2B        | NP_000929    | 14 | 14.1 | 689  | 0.8356 |
| POLR2G | POLR2C        | NP_116558    | 7  | 31.6 | 403  | 0.8159 |
| POLR2G | POLR2D        | NP_004796    | 12 | 72.5 | 816  | 0.8374 |
| POLR2G | POLR2H        | NP_006223    | 4  | 30.0 | 269  | 0.8151 |
| POLR2G | PRPF31        | CAB43677     | 5  | 12.0 | 196  | 0.7373 |

|        |               |           |     |      |      |        |
|--------|---------------|-----------|-----|------|------|--------|
| POLR2G | TUBA4B        | EAW70721  | 2   | 16.6 | 157  | 0.7999 |
| POLR2G | TUBB2A        | NP_001060 | 14  | 36.2 | 789  | 0.8148 |
| POLR2G | TUBB2C        | EAW88369  | 17  | 44.4 | 1006 | 0.7836 |
| POLR2G | TUBB3         | AAH01678  | 11  | 31.5 | 643  | 0.7997 |
| POLR2G | TUBB4         | NP_006078 | 14  | 35.1 | 860  | 0.7896 |
| POLR2G | TUBB6         | EAX01553  | 7   | 20.1 | 436  | 0.7923 |
| POLR2J | CTDP1         | Q9Y5B0    | 38  | 43.1 | 1907 | 0.8918 |
| POLR2J | GPN1          | CAA09376  | 6   | 28.5 | 360  | 0.8987 |
| POLR2J | GPN2          | AAH08634  | 3   | 13.9 | 200  | 0.7772 |
| POLR2J | GRINL1A       | NP_056347 | 23  | 66.0 | 1324 | 0.9403 |
| POLR2J | GTF2B         | AAB23144  | 18  | 59.5 | 1062 | 0.8692 |
| POLR2J | GTF2F1        | P35269    | 28  | 43.5 | 1769 | 0.9012 |
| POLR2J | GTF2F2        | NP_004119 | 18  | 73.5 | 1028 | 0.8985 |
| POLR2J | PIH1D1        | AAH01108  | 3   | 13.8 | 121  | 0.8303 |
| POLR2J | POLR1C        | CAI42628  | 4   | 16.2 | 137  | 0.7457 |
| POLR2J | POLR2A        | NP_000928 | 109 | 61.1 | 7377 | 0.9813 |
| POLR2J | POLR2B        | NP_000929 | 85  | 70.4 | 5598 | 0.9798 |
| POLR2J | POLR2C        | NP_116558 | 24  | 82.9 | 1752 | 0.8965 |
| POLR2J | POLR2D        | NP_004796 | 7   | 54.9 | 493  | 0.8775 |
| POLR2J | POLR2E        | NP_002686 | 14  | 71.0 | 813  | 0.8352 |
| POLR2J | POLR2F        | NP_068809 | 3   | 12.6 | 106  | 0.7345 |
| POLR2J | POLR2G        | NP_002687 | 9   | 51.7 | 622  | 0.9284 |
| POLR2J | POLR2H        | NP_006223 | 6   | 50.7 | 455  | 0.8451 |
| POLR2J | POLR2I        | NP_006224 | 7   | 71.2 | 431  | 0.8425 |
| POLR2J | POLR2J2       | CAC18329  | 5   | 45.2 | 269  | 0.7569 |
| POLR2J | POLR2K        | NP_005025 | 4   | 56.9 | 158  | 0.7482 |
| POLR2J | POLR2L        | NP_066951 | 2   | 29.9 | 103  | 0.7647 |
| POLR2J | RECQL5        | AAG22469  | 3   | 6.7  | 95   | 0.7577 |
| POLR2J | RP11-631M21.2 | EAW69700  | 2   | 28.6 | 100  | 0.8128 |
| POLR2J | RPAP1         | EAW92504  | 47  | 44.3 | 2823 | 0.9522 |
| POLR2J | RPAP2         | EAW73096  | 25  | 40.4 | 1186 | 0.9345 |
| POLR2J | RPAP3         | AAH56415  | 11  | 20.1 | 549  | 0.8685 |
| POLR2J | RPRD1A        | NP_060640 | 15  | 51.0 | 999  | 0.8249 |
| POLR2J | RUVBL1        | BAD96295  | 5   | 14.7 | 392  | 0.7798 |
| POLR2J | RUVBL2        | AAD34041  | 3   | 8.6  | 199  | 0.8090 |
| POLR2J | TUBA1A        | CAA25855  | 17  | 50.1 | 1322 | 0.8225 |
| POLR2J | TUBA4A        | EAW70718  | 2   | 7.4  | 157  | 0.7743 |
| POLR2J | TUBA4B        | EAW70721  | 3   | 16.6 | 191  | 0.8066 |
| POLR2J | TUBA8         | NP_061816 | 8   | 7.1  | 618  | 0.8047 |
| POLR2J | TUBB          | AAH20946  | 28  | 66.2 | 2131 | 0.7989 |
| POLR2J | TUBB2A        | NP_001060 | 21  | 54.4 | 1452 | 0.8462 |
| POLR2J | TUBB3         | NP_006077 | 15  | 31.1 | 1039 | 0.8028 |
| POLR2J | TUBB4         | NP_006078 | 18  | 45.3 | 1142 | 0.8125 |
| POLR2J | TUBB6         | EAX01553  | 7   | 17.9 | 474  | 0.7796 |
| POLR3G | HNRNPU        | AAH07950  | 5   | 8.1  | 227  | 0.7579 |
| POLR3G | HSPA6         | BAD97082  | 6   | 11.4 | 346  | 0.7710 |
| POLR3G | POLR1C        | CAI42628  | 8   | 35.4 | 471  | 0.7914 |
| POLR3G | POLR1D        | NP_057056 | 2   | 21.8 | 109  | 0.7391 |
| POLR3G | POLR2E        | NP_002686 | 8   | 41.0 | 433  | 0.8032 |
| POLR3G | POLR2H        | NP_006223 | 6   | 42.0 | 360  | 0.7826 |
| POLR3G | POLR3B        | NP_060552 | 4   | 3.1  | 131  | 0.7382 |
| POLR3G | POLR3C        | NP_006459 | 35  | 66.3 | 2054 | 0.8707 |

|        |         |              |    |      |      |        |
|--------|---------|--------------|----|------|------|--------|
| POLR3G | POLR3D  | AAM18216     | 6  | 14.6 | 269  | 0.7711 |
| POLR3G | POLR3E  | BAB14481     | 10 | 14.0 | 432  | 0.7530 |
| POLR3G | POLR3F  | BAD97018     | 8  | 28.2 | 403  | 0.7602 |
| POLR3G | POLR3H  | NP_001018062 | 3  | 32.6 | 185  | 0.9381 |
| POLR3H | HSPA5   | AAF13605     | 3  | 6.3  | 176  | 0.7520 |
| POLR3H | MYLK2   | CAI12816     | 2  | 5.2  | 112  | 0.7342 |
| POLR3H | PCBP2   | CAA55015     | 4  | 15.1 | 180  | 0.7625 |
| POLR3H | POLR1C  | AAH08118     | 7  | 24.6 | 404  | 0.7883 |
| POLR3H | POLR1D  | AAH00889     | 2  | 18.0 | 122  | 0.7585 |
| POLR3H | POLR2E  | P19388       | 2  | 11.0 | 66   | 0.7768 |
| POLR3H | POLR2H  | AAA91458     | 4  | 37.3 | 214  | 0.7726 |
| POLR3H | POLR3A  | NP_008986    | 9  | 7.4  | 293  | 0.7402 |
| POLR3H | POLR3B  | NP_060552    | 14 | 13.0 | 623  | 0.7814 |
| POLR3H | POLR3C  | NP_006459    | 7  | 15.0 | 336  | 0.7632 |
| POLR3H | POLR3D  | AAH04484     | 9  | 26.1 | 377  | 0.8010 |
| POLR3H | POLR3E  | BAB14481     | 8  | 14.6 | 271  | 0.7579 |
| POLR3H | POLR3F  | AAH12588     | 8  | 23.7 | 395  | 0.7841 |
| POLR3H | POLR3G  | NP_006458    | 5  | 18.9 | 211  | 0.7730 |
| RPAP1  | CCT5    | Q9BU08       | 2  | 3.9  | 65   | 0.7651 |
| RPAP1  | CCT6A   | NP_001753    | 4  | 7.2  | 135  | 0.7555 |
| RPAP1  | ELAVL1  | NP_001410    | 4  | 12.9 | 213  | 0.7540 |
| RPAP1  | GPN1    | CAA09376     | 8  | 26.0 | 301  | 0.8622 |
| RPAP1  | HSPD1   | NP_002147    | 10 | 19.0 | 532  | 0.7595 |
| RPAP1  | KPNA2   | NP_002257    | 3  | 8.7  | 165  | 0.8468 |
| RPAP1  | POLR2B  | Q8CFI7       | 30 | 28.4 | 1235 | 0.8312 |
| RPAP1  | POLR2C  | AAC14355     | 11 | 45.8 | 520  | 0.7892 |
| RPAP1  | POLR3B  | NP_060552    | 6  | 5.4  | 195  | 0.7425 |
| RPAP1  | RUVBL1  | NP_003698    | 3  | 6.1  | 117  | 0.8338 |
| RPAP2  | ACTL6A  | NP_829888    | 3  | 8.0  | 116  | 0.7346 |
| RPAP2  | C19orf2 | NP_604431    | 5  | 9.7  | 233  | 0.8130 |
| RPAP2  | EIF4A2  | NP_001958    | 4  | 11.1 | 151  | 0.7780 |
| RPAP2  | GPN1    | NP_009197    | 10 | 20.3 | 444  | 0.9188 |
| RPAP2  | GPN3    | NP_057385    | 3  | 10.9 | 133  | 0.8144 |
| RPAP2  | GRINL1A | NP_056347    | 15 | 37.8 | 511  | 0.9582 |
| RPAP2  | HSPA5   | NP_005338    | 2  | 3.5  | 112  | 0.7855 |
| RPAP2  | HSPA8   | NP_006588    | 11 | 17.3 | 511  | 0.8339 |
| RPAP2  | INTS1   | XP_379767    | 8  | 2.8  | 272  | 0.7559 |
| RPAP2  | INTS3   | NP_075391    | 4  | 6.0  | 129  | 0.7569 |
| RPAP2  | INTS4   | NP_291025    | 8  | 8.6  | 239  | 0.7364 |
| RPAP2  | INTS7   | NP_056249    | 6  | 6.4  | 276  | 0.7459 |
| RPAP2  | MED24   | NP_055630    | 3  | 3.3  | 109  | 0.7351 |
| RPAP2  | PDRG1   | NP_110442    | 3  | 15.0 | 137  | 0.8254 |
| RPAP2  | PFDN2   | NP_036526    | 4  | 28.6 | 214  | 0.8476 |
| RPAP2  | PHGDH   | NP_006614    | 3  | 6.6  | 147  | 0.7412 |
| RPAP2  | PIH1D1  | NP_060386    | 5  | 19.0 | 219  | 0.8311 |
| RPAP2  | POLR2A  | NP_000928    | 43 | 17.7 | 1547 | 0.8785 |
| RPAP2  | POLR2B  | NP_000929    | 34 | 25.3 | 1343 | 0.8029 |
| RPAP2  | POLR2C  | NP_002685    | 3  | 9.8  | 148  | 0.7904 |
| RPAP2  | POLR2E  | NP_002686    | 7  | 34.3 | 282  | 0.8073 |
| RPAP2  | POLR2G  | NP_002687    | 3  | 19.2 | 143  | 0.8043 |
| RPAP2  | POLR2H  | NP_006223    | 5  | 33.3 | 259  | 0.8366 |
| RPAP2  | POLR3A  | NP_008986    | 12 | 7.6  | 372  | 0.7744 |

|        |               |           |    |      |      |        |
|--------|---------------|-----------|----|------|------|--------|
| RPAP2  | POLR3B        | NP_060552 | 5  | 4.3  | 217  | 0.7448 |
| RPAP2  | RFC3          | NP_002906 | 2  | 7.9  | 128  | 0.7687 |
| RPAP2  | RPAP3         | NP_078880 | 12 | 20.6 | 454  | 0.8199 |
| RPAP2  | RUVBL1        | NP_003698 | 12 | 27.2 | 513  | 0.8470 |
| RPAP2  | RUVBL2        | NP_006657 | 21 | 32.6 | 1049 | 0.8725 |
| RPAP2  | TOPBP1        | NP_008958 | 2  | 2.0  | 104  | 0.7374 |
| RPAP2  | WDR92         | NP_612467 | 6  | 18.5 | 231  | 0.8295 |
| RPAP2  | YBX1          | NP_004550 | 2  | 12.0 | 107  | 0.7545 |
| RPAP3  | C19orf2       | NP_604431 | 3  | 6.5  | 100  | 0.8007 |
| RPAP3  | EIF4A1        | NP_001407 | 3  | 8.6  | 147  | 0.7742 |
| RPAP3  | GPN1          | NP_009197 | 1  | 3.5  | 67   | 0.8889 |
| RPAP3  | HSP90AA1      | NP_005339 | 4  | 6.1  | 249  | 0.7972 |
| RPAP3  | HSP90AB1      | NP_031381 | 3  | 3.5  | 113  | 0.7676 |
| RPAP3  | HSPA1B        | NP_005337 | 4  | 7.6  | 135  | 0.7657 |
| RPAP3  | PFDN2         | NP_036526 | 3  | 18.8 | 157  | 0.8714 |
| RPAP3  | PFDN6         | NP_055075 | 2  | 16.3 | 69   | 0.7648 |
| RPAP3  | PIH1D1        | NP_060386 | 2  | 5.5  | 65   | 0.7508 |
| RPAP3  | POLR1A        | NP_056240 | 6  | 3.1  | 226  | 0.7522 |
| RPAP3  | POLR2A        | NP_000928 | 3  | 1.3  | 80   | 0.7712 |
| RPAP3  | POLR2E        | NP_002686 | 8  | 38.1 | 320  | 0.8167 |
| RPAP3  | POLR3A        | NP_008986 | 4  | 2.7  | 115  | 0.7542 |
| RPAP3  | RUVBL1        | NP_003698 | 7  | 15.6 | 279  | 0.8557 |
| RPAP3  | RUVBL2        | NP_006657 | 11 | 27.4 | 562  | 0.8456 |
| RPAP3  | TRIP12        | NP_008958 | 2  | 1.4  | 82   | 0.7683 |
| RPAP3  | WDR92         | NP_612467 | 10 | 24.6 | 346  | 0.9055 |
| RUVBL1 | C12orf45      | AAH32326  | 6  | 22.9 | 285  | 0.7729 |
| RUVBL1 | C1orf57       | CAI22244  | 3  | 18.4 | 143  | 0.7779 |
| RUVBL1 | CAPNS1        | AAV40829  | 6  | 20.9 | 263  | 0.7437 |
| RUVBL1 | CASP14        | AAI03869  | 2  | 8.7  | 126  | 0.7730 |
| RUVBL1 | DMAP1         | CAD97886  | 2  | 6.5  | 106  | 0.7632 |
| RUVBL1 | ELAVL1        | AAP88795  | 3  | 10.1 | 188  | 0.8133 |
| RUVBL1 | HSPA1A        | AAD21816  | 3  | 5.6  | 176  | 0.8119 |
| RUVBL1 | HSPA8         | NP_006588 | 7  | 15.0 | 365  | 0.8566 |
| RUVBL1 | RP11-529I10.4 | NP_056263 | 4  | 19.7 | 266  | 0.8915 |
| RUVBL1 | RUVBL2        | AAH00428  | 25 | 45.4 | 1706 | 0.8384 |
| RUVBL1 | YEATS4        | CAC01935  | 2  | 9.9  | 82   | 0.7601 |
| RUVBL2 | ACTL6A        | NP_829888 | 5  | 13.2 | 301  | 0.8088 |
| RUVBL2 | C12orf45      | AAH32326  | 5  | 22.3 | 274  | 0.7839 |
| RUVBL2 | C19orf2       | NP_003787 | 7  | 14.2 | 370  | 0.8612 |
| RUVBL2 | C1orf57       | CAI22244  | 4  | 26.3 | 265  | 0.8057 |
| RUVBL2 | C8orf41       | AAH07387  | 5  | 13.0 | 316  | 0.7770 |
| RUVBL2 | CCDC95        | AAH47712  | 3  | 15.2 | 176  | 0.7763 |
| RUVBL2 | DDX42         | AAC32396  | 2  | 3.0  | 64   | 0.7354 |
| RUVBL2 | DMAP1         | CAD97886  | 3  | 8.6  | 135  | 0.7715 |
| RUVBL2 | EFTUD2        | AAH02360  | 6  | 6.8  | 292  | 0.8033 |
| RUVBL2 | H2AFV         | AAH04274  | 3  | 25.4 | 139  | 0.7822 |
| RUVBL2 | HNRNPU        | AAP97707  | 2  | 4.3  | 93   | 0.8297 |
| RUVBL2 | HSP90AA2      | AAH23006  | 3  | 5.5  | 126  | 0.7394 |
| RUVBL2 | HSPA1A        | CAI18466  | 12 | 20.3 | 613  | 0.8470 |
| RUVBL2 | KIAA0406      | AAH13755  | 27 | 24.5 | 1594 | 0.9421 |
| RUVBL2 | KIAA1967      | NP_954675 | 3  | 3.8  | 107  | 0.7490 |
| RUVBL2 | KPNB1         | NP_002256 | 4  | 4.2  | 123  | 0.7943 |

|         |               |           |     |      |      |        |
|---------|---------------|-----------|-----|------|------|--------|
| RUVBL2  | MATR3         | NP_954659 | 2   | 3.1  | 112  | 0.7856 |
| RUVBL2  | NOP58         | AAH09306  | 5   | 12.6 | 219  | 0.7832 |
| RUVBL2  | PCBP1         | CAA55016  | 5   | 20.2 | 263  | 0.8100 |
| RUVBL2  | PCBP2         | CAA55015  | 5   | 18.9 | 265  | 0.8200 |
| RUVBL2  | PDRG1         | AAH01856  | 3   | 31.0 | 161  | 0.8644 |
| RUVBL2  | PFDN6         | AAH59783  | 9   | 57.4 | 383  | 0.8658 |
| RUVBL2  | PIH1D1        | NP_060386 | 5   | 16.2 | 269  | 0.8841 |
| RUVBL2  | POLR2B        | NP_000929 | 2   | 1.6  | 69   | 0.8028 |
| RUVBL2  | POLR2E        | AAH04441  | 9   | 36.2 | 327  | 0.8178 |
| RUVBL2  | POLR2H        | AAA91458  | 2   | 21.3 | 80   | 0.8115 |
| RUVBL2  | RFC4          | AAH24022  | 3   | 7.7  | 122  | 0.7815 |
| RUVBL2  | RFC5          | CAG28579  | 2   | 5.3  | 89   | 0.7577 |
| RUVBL2  | RP11-529I10.4 | NP_056263 | 16  | 47.8 | 915  | 0.9650 |
| RUVBL2  | RPAP3         | AAH56415  | 22  | 39.0 | 1197 | 0.9313 |
| RUVBL2  | RPL23         | AAH03518  | 3   | 24.6 | 115  | 0.7641 |
| RUVBL2  | RUVBL1        | BAD96295  | 36  | 60.3 | 2658 | 0.8555 |
| RUVBL2  | SRCAP         | NP_006653 | 21  | 7.3  | 831  | 0.7874 |
| RUVBL2  | TFPT          | AAH07776  | 3   | 11.9 | 193  | 0.7389 |
| RUVBL2  | TUBB2A        | CAA23844  | 6   | 14.2 | 275  | 0.8331 |
| RUVBL2  | UHL5          | CAI10834  | 3   | 15.2 | 109  | 0.7385 |
| RUVBL2  | UXT           | NP_004173 | 6   | 40.1 | 333  | 0.9462 |
| RUVBL2  | WDR92         | BAB71143  | 13  | 36.1 | 592  | 0.8989 |
| RUVBL2  | YEATS4        | CAC01935  | 9   | 39.5 | 498  | 0.9245 |
| RUVBL2  | ZNHIT2        | BAD97078  | 8   | 22.6 | 413  | 0.7988 |
| TUBA1A  | CCT2          | CAG33352  | 6   | 14.6 | 286  | 0.8381 |
| TUBA1A  | CCT3          | CAI14168  | 7   | 12.3 | 357  | 0.8184 |
| TUBA1A  | CCT4          | NP_006421 | 10  | 17.3 | 413  | 0.8675 |
| TUBA1A  | CCT5          | AAH09454  | 4   | 10.6 | 149  | 0.9103 |
| TUBA1A  | CCT6A         | BAD92965  | 6   | 10.4 | 255  | 0.8005 |
| TUBA1A  | CCT7          | EAW99740  | 3   | 4.8  | 166  | 0.7658 |
| TUBA1A  | CCT8          | AAH12584  | 7   | 16.3 | 532  | 0.8354 |
| TUBA1A  | TCP1          | CAA37064  | 7   | 11.5 | 389  | 0.8101 |
| TUBA1A  | TUBB4         | NP_006078 | 9   | 21.6 | 509  | 0.8466 |
| TWISTNB | CD3EAP        | NP_036231 | 18  | 37.8 | 1133 | 0.8466 |
| TWISTNB | KPNA2         | AAH67848  | 6   | 11.7 | 240  | 0.8349 |
| TWISTNB | POLR1A        | EAW99467  | 115 | 65.8 | 6798 | 0.9668 |
| TWISTNB | POLR1B        | NP_061887 | 22  | 20.4 | 972  | 0.8036 |
| TWISTNB | POLR1C        | AAH08118  | 17  | 54.7 | 1067 | 0.8340 |
| TWISTNB | POLR1D        | NP_057056 | 7   | 58.6 | 357  | 0.8088 |
| TWISTNB | POLR1E        | AAH14331  | 21  | 46.8 | 1194 | 0.9630 |
| TWISTNB | POLR2E        | NP_002686 | 13  | 58.1 | 708  | 0.8042 |
| TWISTNB | POLR2H        | NP_006223 | 7   | 59.3 | 512  | 0.7938 |
| TWISTNB | POLR2K        | NP_005025 | 2   | 13.8 | 84   | 0.7404 |
| TWISTNB | POLR2L        | NP_066951 | 4   | 31.3 | 221  | 0.7696 |
| TWISTNB | POLR3A        | NP_008986 | 2   | 1.3  | 91   | 0.7477 |
| TWISTNB | RRN3          | CAC07955  | 16  | 24.1 | 736  | 0.7891 |
| TWISTNB | TCOF1         | EAW61738  | 19  | 11.5 | 871  | 0.7881 |
| UXT     | BAT1          | CAI18284  | 3   | 6.1  | 150  | 0.7786 |
| UXT     | BAT2          | CAB51071  | 23  | 8.4  | 1183 | 0.7353 |
| UXT     | C19orf2       | NP_003787 | 19  | 31.0 | 1004 | 0.8892 |
| UXT     | CAND1         | CAD38737  | 2   | 3.4  | 134  | 0.7882 |
| UXT     | INF2          | NP_116103 | 2   | 7.7  | 118  | 0.7578 |

|       |         |              |    |      |      |        |
|-------|---------|--------------|----|------|------|--------|
| UXT   | KIF5B   | EAW85976     | 5  | 5.9  | 210  | 0.7565 |
| UXT   | LRRRC41 | AAH04953     | 4  | 11.5 | 139  | 0.7574 |
| UXT   | PCBP1   | CAA82631     | 2  | 8.0  | 111  | 0.7632 |
| UXT   | PDRG1   | AAH01856     | 7  | 49.6 | 317  | 0.8946 |
| UXT   | PFDN2   | AAF36151     | 6  | 53.8 | 255  | 0.9490 |
| UXT   | PFDN6   | NP_055075    | 16 | 72.9 | 620  | 0.9478 |
| UXT   | PIH1D1  | AAH01108     | 7  | 35.5 | 332  | 0.9136 |
| UXT   | POLR2E  | EAW69550     | 7  | 49.6 | 286  | 0.8641 |
| UXT   | RPAP3   | EAW57937     | 25 | 36.5 | 1351 | 0.9256 |
| UXT   | RUVBL1  | BAD96295     | 11 | 33.3 | 660  | 0.7923 |
| UXT   | RUVBL2  | NP_006657    | 9  | 20.5 | 510  | 0.8241 |
| UXT   | SF3B2   | EAW74495     | 5  | 7.4  | 210  | 0.7393 |
| UXT   | SMARCC1 | AAC50693     | 5  | 4.0  | 225  | 0.7482 |
| UXT   | SMARCC2 | NP_620706    | 4  | 3.2  | 128  | 0.7375 |
| UXT   | TUBB    | CAI41893     | 8  | 19.7 | 464  | 0.8137 |
| UXT   | TUBB2C  | EAW88369     | 6  | 13.7 | 416  | 0.7940 |
| UXT   | WDR92   | NP_612467    | 2  | 7.8  | 118  | 0.8145 |
| WDR92 | ALB     | AAG35503     | 5  | 10.0 | 239  | 0.7426 |
| WDR92 | C19orf2 | NP_003787    | 13 | 21.3 | 593  | 0.8532 |
| WDR92 | CCT2    | NP_006422    | 7  | 18.9 | 365  | 0.8350 |
| WDR92 | CCT3    | CAI14168     | 8  | 17.2 | 410  | 0.7987 |
| WDR92 | CCT4    | NP_006421    | 10 | 20.4 | 426  | 0.8638 |
| WDR92 | CCT5    | AAH02971     | 6  | 11.3 | 390  | 0.8936 |
| WDR92 | CCT6A   | NP_001009186 | 7  | 15.6 | 294  | 0.8024 |
| WDR92 | CCT7    | EAW99740     | 5  | 11.8 | 238  | 0.8770 |
| WDR92 | CCT8    | AAH12584     | 7  | 16.3 | 556  | 0.8340 |
| WDR92 | HSPA6   | BAD97082     | 6  | 11.7 | 373  | 0.8015 |
| WDR92 | HSPA8   | NP_694881    | 3  | 6.5  | 148  | 0.8081 |
| WDR92 | PDRG1   | AAH01856     | 3  | 30.2 | 130  | 0.7799 |
| WDR92 | PFDN2   | NP_036526    | 9  | 48.1 | 363  | 0.8792 |
| WDR92 | PFDN6   | NP_055075    | 11 | 52.7 | 473  | 0.8491 |
| WDR92 | PIH1D1  | AAH01108     | 16 | 69.3 | 1039 | 0.9319 |
| WDR92 | POLR2E  | AAB19339     | 2  | 39.6 | 73   | 0.8545 |
| WDR92 | POLR3A  | NP_008986    | 3  | 2.5  | 138  | 0.8039 |
| WDR92 | RPAP3   | EAW57937     | 52 | 71.9 | 2728 | 0.9358 |
| WDR92 | RUVBL1  | BAD96295     | 14 | 39.0 | 948  | 0.8211 |
| WDR92 | RUVBL2  | NP_006657    | 16 | 31.3 | 999  | 0.8460 |
| WDR92 | TCP1    | CAA37064     | 7  | 14.7 | 327  | 0.8231 |
| WDR92 | TUBA1A  | CAA25855     | 7  | 25.5 | 473  | 0.8620 |
| WDR92 | TUBB    | CAI41893     | 9  | 21.4 | 472  | 0.8228 |
| WDR92 | UXT     | NP_004173    | 5  | 26.1 | 287  | 0.9200 |

---

**Supplementary Table S2**

Detailed mass spectrometry data for yeast TAP interactions. Annotated spectra for proteins identified on the basis of a single peptide are presented in supplemental Table S5 and supplemental Figure S2. ND: not determined.

| <b>Yeast Standard Name</b> | <b>Yeast systematic Name</b> | <b>Human protein Name</b> | <b>Accession number</b> | <b>Yeast Unique Peptide Match</b> | <b>Sequence Coverage %</b> | <b>Yeast Protein Mascot Score</b> |
|----------------------------|------------------------------|---------------------------|-------------------------|-----------------------------------|----------------------------|-----------------------------------|
| Rpb2                       | YOR151C                      | POLR2B                    | AAA68096                | 16                                | 12                         | 780                               |
| Rpb1                       | YDL140C                      | POLR2A                    | CAA26904                | 12                                | 7                          | 531                               |
| Rpb7                       | YDR404C                      | POLR2G                    | 2B8K_G                  | 4                                 | 15                         | 320                               |
| Hsp60                      | YLR259C                      | HSPD1                     | NP_013360               | 2                                 | 5                          | 142                               |
| Rpap2                      | YER139C                      | RPAP2                     | NP_011066               | 3                                 | 21                         | 214                               |
| Hsp70                      | YDL229W                      | ND                        | NP_010052               | 2                                 | 4                          | 145                               |
| Rpb3                       | YIL021W                      | POLR2C                    | AAA34889                | 3                                 | 9                          | 137                               |
| Rpb8                       | YOR224C                      | POLR2H                    | NP_014867               | 3                                 | 17                         | 134                               |
| Rpb5                       | YBR154C                      | POLR2E                    | AAC60556                | 2                                 | 8                          | 130                               |
| Rvs167                     | YDR388W                      | ND                        | NP_010676               | 2                                 | 1                          | 44                                |
| Rpb12                      | YHR143W-A                    | POLR2K                    | NP_012013               | 1                                 | 38                         | 45                                |
| Rpc1                       | YOR116C                      | POLR3C                    | NP_014759               | 2                                 | 3                          | 39                                |
| Rpb6                       | YPR187W                      | POLR2F                    | NP_015513               | 1                                 | 12                         | 30                                |

**Supplemental Table S3.**

Yeast strains and plasmids used in this study

| Strain/Plasmid       | Description                                                                                                                                                                                                                                                         | Source                    |
|----------------------|---------------------------------------------------------------------------------------------------------------------------------------------------------------------------------------------------------------------------------------------------------------------|---------------------------|
| <i>Yeast strains</i> |                                                                                                                                                                                                                                                                     |                           |
| BY4347-22250         | <i>MATa</i> $\alpha$ <i>his3</i> $\Delta$ 1/ <i>his3</i> $\Delta$ 1 <i>leu2</i> $\Delta$ 0/ <i>leu2</i> $\Delta$ 0 <i>met15</i> $\Delta$ 0/ <i>MET15</i> <i>ura3</i> $\Delta$ 0/ <i>ura3</i> $\Delta$ 0 <i>lys2</i> $\Delta$ 0/ <i>LYS2</i> <i>npa3::kanMX/NPA3</i> | Invitrogen                |
| BCY74                | <i>MATa</i> <i>his3</i> $\Delta$ 1 <i>leu2</i> $\Delta$ 0 <i>met15</i> $\Delta$ 0 <i>ura3</i> $\Delta$ 0 <i>lys2</i> $\Delta$ 0 <i>npa3::kanMX</i> pRS316- <i>NPA3</i>                                                                                              | This study                |
| BCY93                | <i>MATa</i> <i>his3</i> $\Delta$ 1 <i>leu2</i> $\Delta$ 0 <i>met15</i> $\Delta$ 0 <i>ura3</i> $\Delta$ 0 <i>lys2</i> $\Delta$ 0 <i>npa3::kanMX</i> pRS316- <i>NPA3</i> pRS415                                                                                       | This study                |
| BCY75                | <i>MATa</i> <i>his3</i> $\Delta$ 1 <i>leu2</i> $\Delta$ 0 <i>met15</i> $\Delta$ 0 <i>ura3</i> $\Delta$ 0 <i>lys2</i> $\Delta$ 0 <i>npa3::kanMX</i> pRS316- <i>NPA3</i> pRS415- <i>NPA3</i>                                                                          | This study                |
| BCY86                | <i>MATa</i> <i>his3</i> $\Delta$ 1 <i>leu2</i> $\Delta$ 0 <i>met15</i> $\Delta$ 0 <i>ura3</i> $\Delta$ 0 <i>lys2</i> $\Delta$ 0 <i>npa3::kanMX</i> pRS316- <i>NPA3</i> pRS415- <i>npa3</i> -K16R                                                                    | This study                |
| BCY87                | <i>MATa</i> <i>his3</i> $\Delta$ 1 <i>leu2</i> $\Delta$ 0 <i>met15</i> $\Delta$ 0 <i>ura3</i> $\Delta$ 0 <i>lys2</i> $\Delta$ 0 <i>npa3::kanMX</i> pRS316- <i>NPA3</i> pRS415- <i>npa3</i> -K16A                                                                    | This study                |
| BCY89                | <i>MATa</i> <i>his3</i> $\Delta$ 1 <i>leu2</i> $\Delta$ 0 <i>met15</i> $\Delta$ 0 <i>ura3</i> $\Delta$ 0 <i>lys2</i> $\Delta$ 0 <i>npa3::kanMX</i> pRS316- <i>NPA3</i> pRS415- <i>npa3</i> -K16I                                                                    | This study                |
| BCY127               | <i>MATa</i> <i>his3</i> $\Delta$ 1 <i>leu2</i> $\Delta$ 0 <i>met15</i> $\Delta$ 0 <i>ura3</i> $\Delta$ 0 <i>lys2</i> $\Delta$ 0 <i>npa3::kanMX</i> pRS316- <i>NPA3</i> pRS415- <i>npa3</i> -D40A                                                                    | This study                |
| BCY129               | <i>MATa</i> <i>his3</i> $\Delta$ 1 <i>leu2</i> $\Delta$ 0 <i>met15</i> $\Delta$ 0 <i>ura3</i> $\Delta$ 0 <i>lys2</i> $\Delta$ 0 <i>npa3::kanMX</i> pRS316- <i>NPA3</i> pRS415- <i>npa3</i> -D40E                                                                    | This study                |
| BCY110               | <i>MATa</i> <i>his3</i> $\Delta$ 1 <i>leu2</i> $\Delta$ 0 <i>met15</i> $\Delta$ 0 <i>ura3</i> $\Delta$ 0 <i>lys2</i> $\Delta$ 0 <i>npa3::kanMX</i> pRS316- <i>NPA3</i> pRS415- <i>npa3</i> -G70A                                                                    | This study                |
| BCY111               | <i>MATa</i> <i>his3</i> $\Delta$ 1 <i>leu2</i> $\Delta$ 0 <i>met15</i> $\Delta$ 0 <i>ura3</i> $\Delta$ 0 <i>lys2</i> $\Delta$ 0 <i>npa3::kanMX</i> pRS316- <i>NPA3</i> pRS415- <i>npa3</i> -P71A                                                                    | This study                |
| BCY112               | <i>MATa</i> <i>his3</i> $\Delta$ 1 <i>leu2</i> $\Delta$ 0 <i>met15</i> $\Delta$ 0 <i>ura3</i> $\Delta$ 0 <i>lys2</i> $\Delta$ 0 <i>npa3::kanMX</i> pRS316- <i>NPA3</i> pRS415- <i>npa3</i> -N72A                                                                    | This study                |
| BCY113               | <i>MATa</i> <i>his3</i> $\Delta$ 1 <i>leu2</i> $\Delta$ 0 <i>met15</i> $\Delta$ 0 <i>ura3</i> $\Delta$ 0 <i>lys2</i> $\Delta$ 0 <i>npa3::kanMX</i> pRS316- <i>NPA3</i> pRS415- <i>npa3</i> -N72Q                                                                    | This study                |
| BCY163               | <i>MATa</i> <i>his3</i> $\Delta$ 1 <i>leu2</i> $\Delta$ 0 <i>met15</i> $\Delta$ 0 <i>ura3</i> $\Delta$ 0 <i>lys2</i> $\Delta$ 0 <i>npa3::kanMX</i> pRS316- <i>NPA3</i> pRS415- <i>npa3</i> -D106A                                                                   | This study                |
| BCY237               | <i>MATa</i> <i>his3</i> $\Delta$ 1 <i>leu2</i> $\Delta$ 0 <i>met15</i> $\Delta$ 0 <i>ura3</i> $\Delta$ 0 <i>lys2</i> $\Delta$ 0 <i>npa3::kanMX</i> pRS316- <i>NPA3</i> pRS415- <i>npa3</i> -D106E                                                                   | This study                |
| BCY148               | <i>MATa</i> <i>his3</i> $\Delta$ 1 <i>leu2</i> $\Delta$ 0 <i>met15</i> $\Delta$ 0 <i>ura3</i> $\Delta$ 0 <i>lys2</i> $\Delta$ 0 <i>npa3::kanMX</i> pRS316- <i>NPA3</i> pRS415- <i>npa3</i> -P108A                                                                   | This study                |
| BCY164               | <i>MATa</i> <i>his3</i> $\Delta$ 1 <i>leu2</i> $\Delta$ 0 <i>met15</i> $\Delta$ 0 <i>ura3</i> $\Delta$ 0 <i>lys2</i> $\Delta$ 0 <i>npa3::kanMX</i> pRS316- <i>NPA3</i> pRS415- <i>npa3</i> -G109A                                                                   | This study                |
| BCY155               | <i>MATa</i> <i>his3</i> $\Delta$ 1 <i>leu2</i> $\Delta$ 0 <i>met15</i> $\Delta$ 0 <i>ura3</i> $\Delta$ 0 <i>lys2</i> $\Delta$ 0 <i>npa3::kanMX</i> pRS316- <i>NPA3</i> pRS415- <i>npa3</i> -Q110A                                                                   | This study                |
| BCY160               | <i>MATa</i> <i>his3</i> $\Delta$ 1 <i>leu2</i> $\Delta$ 0 <i>met15</i> $\Delta$ 0 <i>ura3</i> $\Delta$ 0 <i>lys2</i> $\Delta$ 0 <i>npa3::kanMX</i> pRS316- <i>NPA3</i> pRS415- <i>npa3</i> -Q110N                                                                   | This study                |
| <i>Plasmids</i>      |                                                                                                                                                                                                                                                                     |                           |
| pRS316               | <i>URA3</i> , <i>ampR</i> , <i>CEN6</i> , <i>ARSH4</i>                                                                                                                                                                                                              | Sikorski and Heiter, 1989 |
| pRS415               | <i>LEU2</i> , <i>ampR</i> , <i>CEN6</i> , <i>ARSH4</i>                                                                                                                                                                                                              | Sikorski and Heiter, 1989 |



**Supplemental Table S4**

Annotation for human proteins identified on the basis of a single peptide.

| <b>Affinity Tagged Polypeptides</b> | <b>Interaction Partners</b> | <b>Peptide sequence</b>        | <b>Observed precursor m/z</b> | <b>Charge</b> | <b>Protein Mascot Score</b> |
|-------------------------------------|-----------------------------|--------------------------------|-------------------------------|---------------|-----------------------------|
| CCT5                                | XPO1                        | YYGLQILENVIK                   | 726.9174                      | 2             | 53.56                       |
| GPN1                                | KPNA2                       | LLGASELPIVTPALR                | 775.6239                      | 2             | 49.96                       |
| GPN1                                | POLR2D                      | AGDVEEDASQLIFPK                | 809.9060                      | 2             | 68.74                       |
| GPN1                                | XPO1                        | EPEVLSTMAIIVNK + Oxidation (M) | 780.8839                      | 2             | 39.28                       |
| GPN3                                | GPN1                        | SMSLVLDEFYSSLR                 | 823.9111                      | 2             | 77.12                       |
| KPNA2                               | POLR1D                      | GTLPAVEPFQR                    | 607.8367                      | 2             | 49.02                       |
| KPNA2                               | POLR1E                      | AAETIIDTK                      | 481.2692                      | 2             | 57.41                       |
| KPNA2                               | POLR2K                      | LVVFDAR                        | 410.2443                      | 2             | 45.12                       |
| POLR2A                              | KPNA2                       | NKNPAPPIDAVEQILPTLVR           | 1093.1200                     | 2             | 78.56                       |
| RPAP3                               | GPN1                        | DMGSVALDAGTAK + Oxidation (M)  | 626.9589                      | 2             | 66.52                       |

**Supplemental Table S5**

Annotation for yeast proteins identified on the basis of a single peptide.

| <b>Yeast<br/>Standard<br/>Name</b> | <b>Yeast<br/>Systematic<br/>Name</b> | <b>Peptide sequence</b>              | <b>Observed<br/>precursor<br/>m/z</b> | <b>Charge</b> | <b>Protein<br/>Mascot<br/>Score</b> |
|------------------------------------|--------------------------------------|--------------------------------------|---------------------------------------|---------------|-------------------------------------|
| Rvs167                             | YDR388W                              | FQELEQETK                            | 576.2864                              | 2             | 44                                  |
| Rpb12                              | YHR143W-A                            | LVQFEAR                              | 431.7438                              | 2             | 45                                  |
| Rpc1                               | YOR116C                              | LVRYDNSGCLVK + carbamidomethyl ( C ) | 712.3654                              | 2             | 32                                  |
| Rpb6                               | YPR187W                              | TIVTGGNGPEDFQQHEQIR                  | 709.3552                              | 3             | 30                                  |

**Supplemental Figure S1**

Annotated spectra for proteins identified on the basis of a single peptide.

|                                    |                            |                |
|------------------------------------|----------------------------|----------------|
| <i>Affinity tagged polypeptide</i> | <i>Interaction partner</i> | <i>peptide</i> |
|------------------------------------|----------------------------|----------------|

|      |      |              |
|------|------|--------------|
| CCT5 | XPO1 | YYGLQILENVIK |
|------|------|--------------|

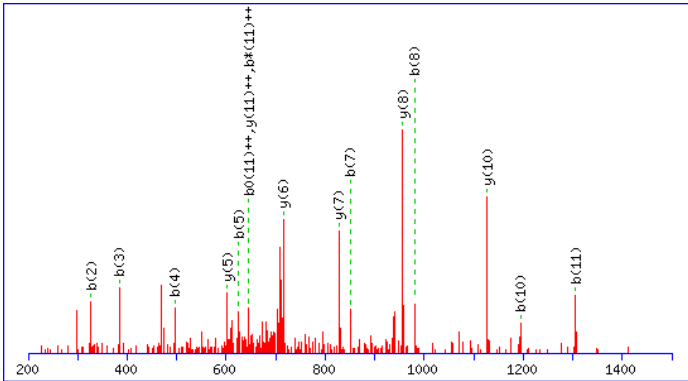

| #  | b              | b <sup>++</sup> | Seq. | y              | y <sup>++</sup> | #  |
|----|----------------|-----------------|------|----------------|-----------------|----|
| 1  | 164.071        | 82.5389         | Y    |                |                 | 12 |
| 2  | <b>327.134</b> | 164.071         | Y    | 1289.75        | <b>645.377</b>  | 11 |
| 3  | <b>384.155</b> | 192.581         | G    | <b>1126.68</b> | 563.845         | 10 |
| 4  | <b>497.24</b>  | 249.123         | L    | 1069.66        | 535.334         | 9  |
| 5  | <b>625.298</b> | 313.153         | Q    | <b>956.578</b> | 478.792         | 8  |
| 6  | 738.382        | 369.695         | I    | <b>828.519</b> | 414.763         | 7  |
| 7  | <b>851.466</b> | 426.237         | L    | <b>715.435</b> | 358.221         | 6  |
| 8  | <b>980.509</b> | 490.758         | E    | <b>602.351</b> | 301.679         | 5  |
| 9  | 1094.55        | 547.78          | N    | 473.308        | 237.158         | 4  |
| 10 | <b>1193.62</b> | 597.314         | V    | 359.265        | 180.136         | 3  |
| 11 | <b>1306.7</b>  | 653.856         | I    | 260.197        | 130.602         | 2  |
| 12 |                |                 | K    | 147.113        | 74.06           | 1  |

|      |       |                |
|------|-------|----------------|
| GPN1 | KPNA2 | LLGASELPVTPALR |
|------|-------|----------------|

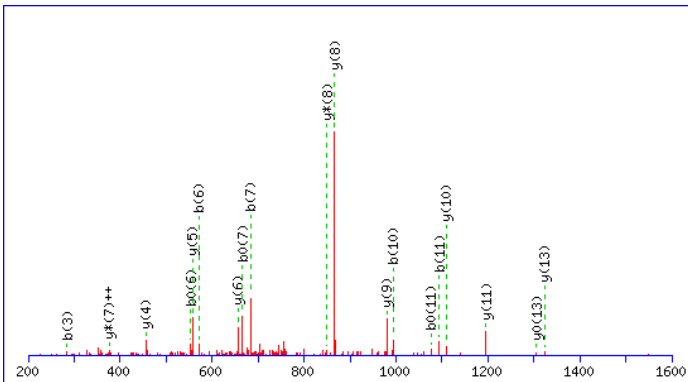

| #  | b              | b <sup>0</sup> | Seq. | y              | y <sup>++</sup> | #  |
|----|----------------|----------------|------|----------------|-----------------|----|
| 1  | 114.091        |                | L    |                |                 | 15 |
| 2  | 227.175        |                | L    | 1436.85        | 718.927         | 14 |
| 3  | <b>284.197</b> |                | G    | <b>1323.76</b> | 662.385         | 13 |
| 4  | 355.234        |                | A    | 1266.74        | 633.874         | 12 |
| 5  | 442.266        | 424.255        | S    | <b>1195.7</b>  | 598.356         | 11 |
| 6  | <b>571.309</b> | <b>553.298</b> | E    | <b>1108.67</b> | 554.84          | 10 |
| 7  | <b>684.393</b> | <b>666.382</b> | L    | <b>979.63</b>  | 490.319         | 9  |
| 8  | 781.445        | 763.435        | P    | <b>866.546</b> | 433.777         | 8  |
| 9  | 894.53         | 876.519        | I    | 769.493        | 385.25          | 7  |
| 10 | <b>993.598</b> | 975.587        | V    | <b>656.409</b> | 328.708         | 6  |
| 11 | <b>1094.65</b> | <b>1076.64</b> | T    | <b>557.341</b> | 279.174         | 5  |
| 12 | 1191.7         | 1173.69        | P    | <b>456.293</b> | 228.65          | 4  |
| 13 | 1262.74        | 1244.72        | A    | 359.24         | 180.124         | 3  |
| 14 | 1375.82        | 1357.81        | L    | 288.203        | 144.605         | 2  |
| 15 |                |                | R    | 175.119        | 88.0631         | 1  |

|      |        |                 |
|------|--------|-----------------|
| GPN1 | POLR2D | AGDVEEDASQLIFPK |
|------|--------|-----------------|

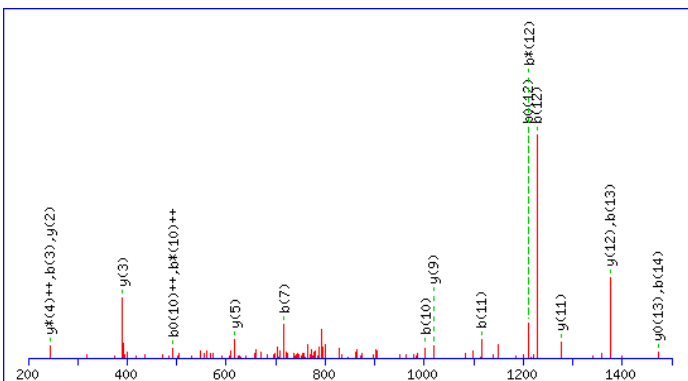

| #  | b              | b <sup>++</sup> | Seq. | y              | y <sup>++</sup> | #  |
|----|----------------|-----------------|------|----------------|-----------------|----|
| 1  | 72.0444        | 36.5258         | A    |                |                 | 15 |
| 2  | 129.066        | 65.0366         | G    | 1547.76        | 774.383         | 14 |
| 3  | <b>244.093</b> | 122.55          | D    | 1490.74        | 745.872         | 13 |
| 4  | 343.161        | 172.084         | V    | <b>1375.71</b> | 688.359         | 12 |
| 5  | 472.204        | 236.606         | E    | <b>1276.64</b> | 638.825         | 11 |
| 6  | 601.246        | 301.127         | E    | 1147.6         | 574.303         | 10 |
| 7  | <b>716.273</b> | 358.64          | D    | <b>1018.56</b> | 509.782         | 9  |
| 8  | 787.31         | 394.159         | A    | 903.53         | 452.269         | 8  |
| 9  | 874.343        | 437.675         | S    | 832.493        | 416.75          | 7  |
| 10 | <b>1002.4</b>  | 501.704         | Q    | 745.461        | 373.234         | 6  |
| 11 | <b>1115.49</b> | 558.246         | L    | <b>617.402</b> | 309.205         | 5  |
| 12 | <b>1228.57</b> | 614.788         | I    | 504.318        | 252.663         | 4  |
| 13 | <b>1375.64</b> | 688.322         | F    | <b>391.234</b> | 196.121         | 3  |
| 14 | <b>1472.69</b> | 736.849         | P    | <b>244.166</b> | 122.586         | 2  |
| 15 |                |                 | K    | 147.113        | 74.06           | 1  |

**Supplemental Figure S1**

Annotated spectra for proteins identified on the basis of a single peptide.

| <i>Affinity tagged polypeptide</i> | <i>Interaction partner</i> | <i>peptide</i> |
|------------------------------------|----------------------------|----------------|
|------------------------------------|----------------------------|----------------|

|      |      |                             |
|------|------|-----------------------------|
| GPN1 | XPO1 | EPEVLSTMAIIVNK +Oxidation M |
|------|------|-----------------------------|

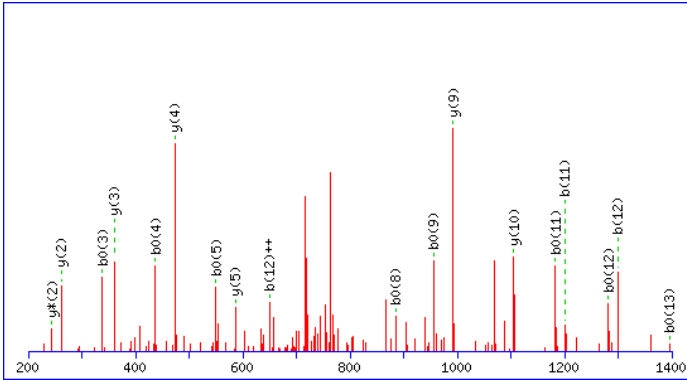

| #  | b              | b <sup>0</sup> | Seq. | y              | y <sup>++</sup> | #  |
|----|----------------|----------------|------|----------------|-----------------|----|
| 1  | 130.05         | 112.039        | E    |                |                 | 14 |
| 2  | 227.103        | 209.092        | P    | 1430.79        | 715.9           | 13 |
| 3  | 356.145        | <b>338.135</b> | E    | 1333.74        | 667.373         | 12 |
| 4  | 455.214        | <b>437.203</b> | V    | 1204.7         | 602.852         | 11 |
| 5  | 568.298        | <b>550.287</b> | L    | <b>1105.63</b> | 553.318         | 10 |
| 6  | 655.33         | 637.319        | S    | <b>992.545</b> | 496.776         | 9  |
| 7  | 756.377        | 738.367        | T    | 905.512        | 453.26          | 8  |
| 8  | 903.413        | <b>885.402</b> | M    | 804.465        | 402.736         | 7  |
| 9  | 974.45         | <b>956.439</b> | A    | 657.429        | 329.218         | 6  |
| 10 | 1087.53        | 1069.52        | I    | <b>586.392</b> | 293.7           | 5  |
| 11 | <b>1200.62</b> | <b>1182.61</b> | I    | <b>473.308</b> | 237.158         | 4  |
| 12 | <b>1299.69</b> | <b>1281.68</b> | V    | <b>360.224</b> | 180.616         | 3  |
| 13 | 1413.73        | <b>1395.72</b> | N    | <b>261.156</b> | 131.082         | 2  |
| 14 |                |                | K    | 147.113        | 74.06           | 1  |

|      |      |                |
|------|------|----------------|
| GPN3 | GPN1 | SMSLVLDEFYSSLR |
|------|------|----------------|

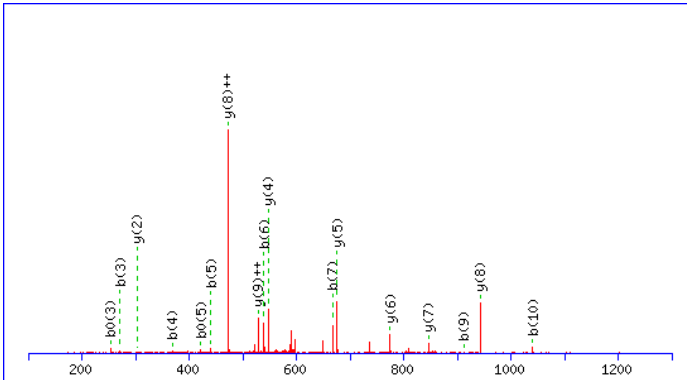

| #  | b              | b <sup>0</sup> | Seq. | y              | y <sup>++</sup> | #  |
|----|----------------|----------------|------|----------------|-----------------|----|
| 1  | 88.0393        | 70.0287        | S    |                |                 | 14 |
| 2  | 219.08         | 201.069        | M    | 1559.78        | 780.392         | 13 |
| 3  | <b>306.112</b> | <b>288.101</b> | S    | <b>1428.74</b> | 714.872         | 12 |
| 4  | 419.196        | 401.185        | L    | 1341.7         | 671.356         | 11 |
| 5  | <b>518.264</b> | <b>500.254</b> | V    | <b>1228.62</b> | 614.814         | 10 |
| 6  | <b>631.348</b> | <b>613.338</b> | L    | <b>1129.55</b> | 565.28          | 9  |
| 7  | 746.375        | 728.365        | D    | <b>1016.47</b> | 508.738         | 8  |
| 8  | <b>875.418</b> | 857.407        | E    | <b>901.441</b> | 451.224         | 7  |
| 9  | <b>1022.49</b> | <b>1004.48</b> | F    | <b>772.399</b> | 386.703         | 6  |
| 10 | <b>1185.55</b> | <b>1167.54</b> | Y    | <b>625.33</b>  | 313.169         | 5  |
| 11 | <b>1272.58</b> | 1254.57        | S    | <b>462.267</b> | 231.637         | 4  |
| 12 | <b>1359.61</b> | 1341.6         | S    | <b>375.235</b> | 188.121         | 3  |
| 13 | <b>1472.7</b>  | <b>1454.69</b> | L    | <b>288.203</b> | 144.605         | 2  |
| 14 |                |                | R    | 175.119        | 88.0631         | 1  |

|       |        |             |
|-------|--------|-------------|
| KPNA2 | POLR1D | GTLPAVEPFQR |
|-------|--------|-------------|

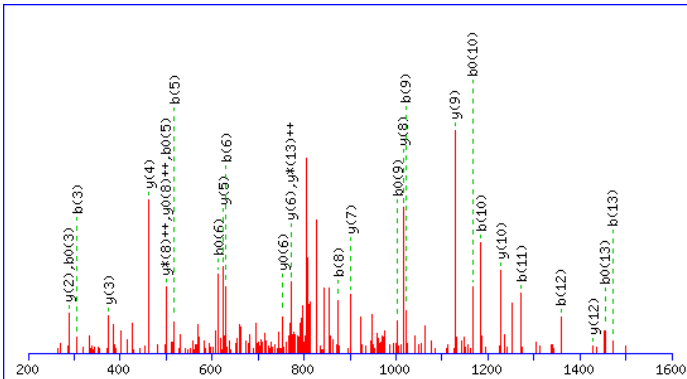

| #  | b              | b <sup>++</sup> | Seq. | y              | y <sup>++</sup> | #  |
|----|----------------|-----------------|------|----------------|-----------------|----|
| 1  | 58.0287        | 29.518          | G    |                |                 | 11 |
| 2  | 159.076        | 80.0418         | T    | 1157.63        | 579.319         | 10 |
| 3  | <b>272.161</b> | 136.584         | L    | 1056.58        | <b>528.796</b>  | 9  |
| 4  | <b>369.213</b> | 185.11          | P    | <b>943.5</b>   | <b>472.253</b>  | 8  |
| 5  | <b>440.25</b>  | 220.629         | A    | <b>846.447</b> | 423.727         | 7  |
| 6  | <b>539.319</b> | 270.163         | V    | <b>775.41</b>  | 388.209         | 6  |
| 7  | <b>668.361</b> | 334.684         | E    | <b>676.341</b> | 338.674         | 5  |
| 8  | 765.414        | 383.211         | P    | <b>547.299</b> | 274.153         | 4  |
| 9  | <b>912.483</b> | 456.745         | F    | 450.246        | 225.627         | 3  |
| 10 | <b>1040.54</b> | 520.774         | Q    | <b>303.178</b> | 152.092         | 2  |
| 11 |                |                 | R    | 175.119        | 88.0631         | 1  |

**Supplemental Figure S1**

Annotated spectra for proteins identified on the basis of a single peptide.

| <i>Affinity tagged polypeptide</i> | <i>Interaction partner</i> | <i>peptide</i> |
|------------------------------------|----------------------------|----------------|
|------------------------------------|----------------------------|----------------|

| KPNA2 | POLR1E | AAETIIDTK |
|-------|--------|-----------|
|-------|--------|-----------|

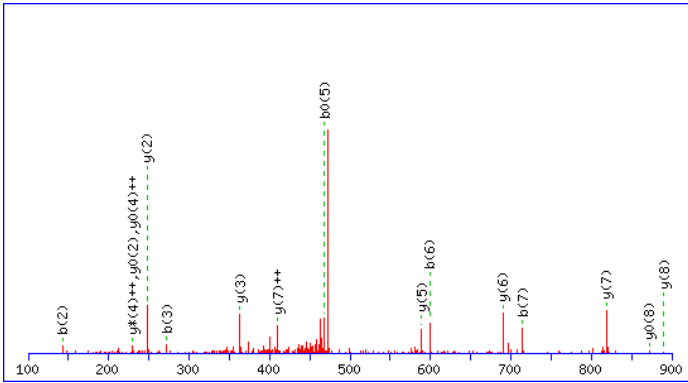

| # | b              | b <sup>++</sup> | Seq. | y              | y <sup>++</sup> | # |
|---|----------------|-----------------|------|----------------|-----------------|---|
| 1 | 72.0444        | 36.5258         | A    |                |                 | 9 |
| 2 | <b>143.082</b> | 72.0444         | A    | <b>890.483</b> | 445.745         | 8 |
| 3 | <b>272.124</b> | 136.566         | E    | <b>819.446</b> | <b>410.227</b>  | 7 |
| 4 | 373.172        | 187.09          | T    | <b>690.403</b> | 345.705         | 6 |
| 5 | 486.256        | 243.632         | I    | <b>589.356</b> | 295.181         | 5 |
| 6 | <b>599.34</b>  | 300.174         | I    | 476.272        | 238.639         | 4 |
| 7 | <b>714.367</b> | 357.687         | D    | <b>363.187</b> | 182.097         | 3 |
| 8 | 815.415        | 408.211         | T    | <b>248.161</b> | 124.584         | 2 |
| 9 |                |                 | K    | 147.113        | 74.06           | 1 |

| KPNA2 | POLR2K | LVVFDAR |
|-------|--------|---------|
|-------|--------|---------|

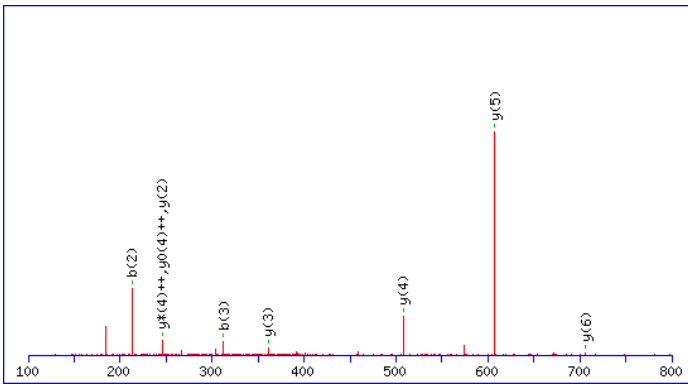

| # | b              | b <sup>++</sup> | Seq. | y              | y <sup>++</sup> | # |
|---|----------------|-----------------|------|----------------|-----------------|---|
| 1 | 114.091        | 57.5493         | L    |                |                 | 7 |
| 2 | <b>213.16</b>  | 107.084         | V    | <b>706.388</b> | 353.698         | 6 |
| 3 | <b>312.228</b> | 156.618         | V    | <b>607.32</b>  | 304.164         | 5 |
| 4 | 459.297        | 230.152         | F    | <b>508.251</b> | 254.629         | 4 |
| 5 | 574.324        | 287.665         | D    | <b>361.183</b> | 181.095         | 3 |
| 6 | 645.361        | 323.184         | A    | <b>246.156</b> | 123.582         | 2 |
| 7 |                |                 | R    | 175.119        | 88.0631         | 1 |

| POLR2A | KPNA2 | NKNPAPPIDAVEQILPTLVR |
|--------|-------|----------------------|
|--------|-------|----------------------|

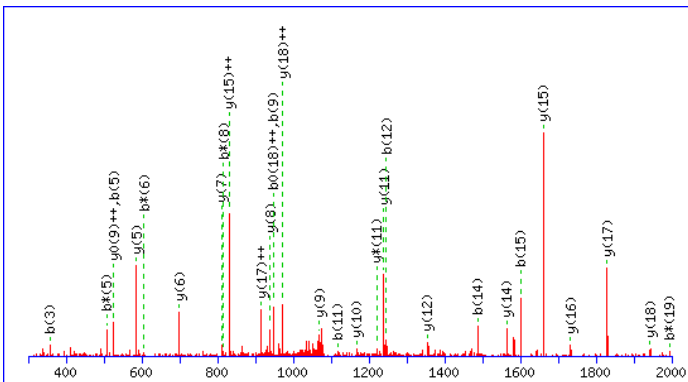

| #  | b              | b <sup>++</sup> | Seq. | y              | y <sup>++</sup> | #  |
|----|----------------|-----------------|------|----------------|-----------------|----|
| 1  | 115.05         | 58.0287         | N    |                |                 | 20 |
| 2  | 243.145        | 122.076         | K    | 2071.19        | 1036.1          | 19 |
| 3  | <b>357.188</b> | 179.098         | N    | <b>1943.1</b>  | <b>972.052</b>  | 18 |
| 4  | 454.241        | 227.624         | P    | <b>1829.05</b> | <b>915.03</b>   | 17 |
| 5  | <b>525.278</b> | 263.143         | A    | <b>1732</b>    | 866.504         | 16 |
| 6  | 622.331        | 311.669         | P    | <b>1660.96</b> | <b>830.985</b>  | 15 |
| 7  | 719.384        | 360.195         | P    | <b>1563.91</b> | 782.459         | 14 |
| 8  | 832.468        | 416.737         | I    | 1466.86        | 733.933         | 13 |
| 9  | <b>947.495</b> | 474.251         | D    | <b>1353.77</b> | 677.39          | 12 |
| 10 | 1018.53        | 509.769         | A    | <b>1238.75</b> | 619.877         | 11 |
| 11 | <b>1117.6</b>  | 559.304         | V    | <b>1167.71</b> | 584.358         | 10 |
| 12 | <b>1246.64</b> | 623.825         | E    | <b>1068.64</b> | 534.824         | 9  |
| 13 | 1374.7         | 687.854         | Q    | <b>939.599</b> | 470.303         | 8  |
| 14 | <b>1487.79</b> | 744.396         | I    | <b>811.54</b>  | 406.274         | 7  |
| 15 | <b>1600.87</b> | 800.938         | L    | <b>698.456</b> | 349.732         | 6  |
| 16 | 1697.92        | 849.465         | P    | <b>585.372</b> | 293.19          | 5  |
| 17 | 1798.97        | 899.989         | T    | 488.319        | 244.663         | 4  |
| 18 | 1912.05        | 956.531         | L    | 387.271        | 194.139         | 3  |
| 19 | 2011.12        | 1006.06         | V    | 274.187        | 137.597         | 2  |
| 20 |                |                 | R    | 175.119        | 88.0631         | 1  |

**Supplemental Figure S1**

Annotated spectra for proteins identified on the basis of a single peptide.

| <i>Affinity tagged polypeptide</i> | <i>Interaction partner</i> | <i>peptide</i>            |
|------------------------------------|----------------------------|---------------------------|
| RPAP3                              | GPN1                       | DMGSVALDAGTAK+Oxidation M |

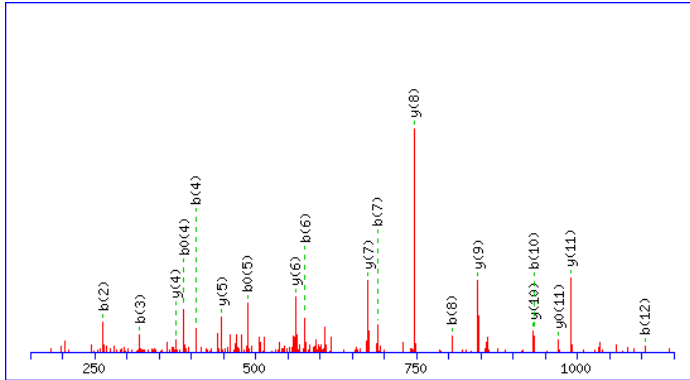

| #  | b       | b <sup>++</sup> | Seq. | y       | y <sup>++</sup> | #  |
|----|---------|-----------------|------|---------|-----------------|----|
| 1  | 116.034 | 58.5207         | D    |         |                 | 13 |
| 2  | 263.07  | 132.038         | M    | 1136.56 | 568.784         | 12 |
| 3  | 320.091 | 160.549         | G    | 989.526 | 495.267         | 11 |
| 4  | 407.123 | 204.065         | S    | 932.505 | 466.756         | 10 |
| 5  | 506.192 | 253.599         | V    | 845.473 | 423.24          | 9  |
| 6  | 577.229 | 289.118         | A    | 746.404 | 373.706         | 8  |
| 7  | 690.313 | 345.66          | L    | 675.367 | 338.187         | 7  |
| 8  | 805.34  | 403.173         | D    | 562.283 | 281.645         | 6  |
| 9  | 876.377 | 438.692         | A    | 447.256 | 224.132         | 5  |
| 10 | 933.398 | 467.203         | G    | 376.219 | 188.613         | 4  |
| 11 | 1034.45 | 517.727         | T    | 319.198 | 160.102         | 3  |
| 12 | 1105.48 | 553.245         | A    | 218.15  | 109.579         | 2  |
| 13 |         |                 | K    | 147.113 | 74.06           | 1  |

**Supplemental Figure S2**

Annotated spectra for proteins identified on the basis of a single peptide.

| <i>Yeast standard name</i> | <i>Yeast systematic name</i> | <i>peptide</i> |
|----------------------------|------------------------------|----------------|
|----------------------------|------------------------------|----------------|

|        |         |           |
|--------|---------|-----------|
| Rvs167 | YDR388W | FQELEQETK |
|--------|---------|-----------|

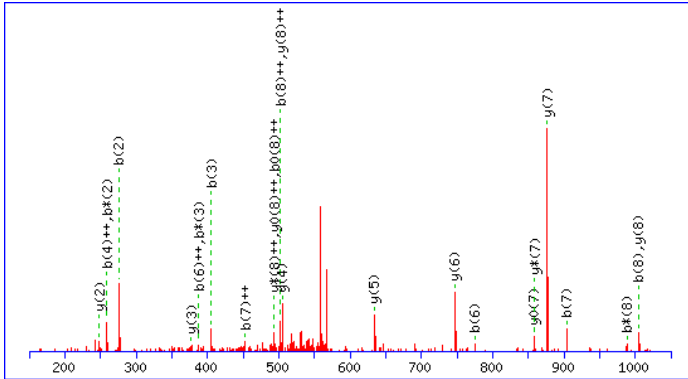

| # | b              | b <sup>++</sup> | Seq. | y              | y <sup>++</sup> | # |
|---|----------------|-----------------|------|----------------|-----------------|---|
| 1 | 148.08         | 74.54           | F    |                |                 | 9 |
| 2 | <b>276.13</b>  | 138.57          | Q    | <b>1004.49</b> | <b>502.75</b>   | 8 |
| 3 | <b>405.18</b>  | 203.09          | E    | <b>876.43</b>  | 438.72          | 7 |
| 4 | 518.26         | <b>259.63</b>   | L    | <b>747.39</b>  | 374.20          | 6 |
| 5 | 647.30         | 324.16          | E    | <b>634.30</b>  | 317.66          | 5 |
| 6 | <b>775.36</b>  | <b>388.18</b>   | Q    | <b>505.26</b>  | 253.13          | 4 |
| 7 | <b>904.40</b>  | <b>452.71</b>   | E    | <b>377.20</b>  | 189.11          | 3 |
| 8 | <b>1005.45</b> | <b>503.23</b>   | T    | <b>248.16</b>  | 124.58          | 2 |
| 9 |                |                 | K    | 147.11         | 74.06           | 1 |

|       |           |         |
|-------|-----------|---------|
| Rpb12 | YHR143W-A | LVQFEAR |
|-------|-----------|---------|

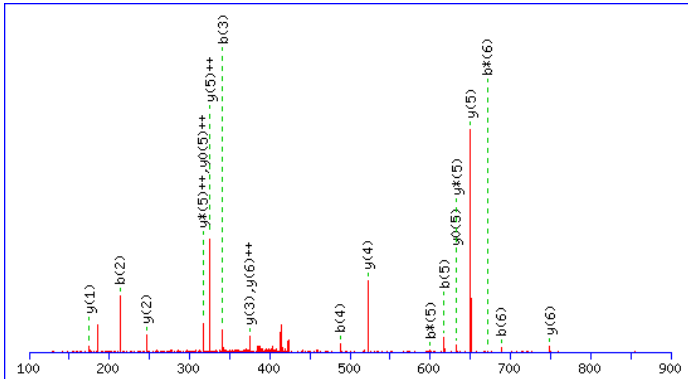

| # | b             | b <sup>++</sup> | Seq. | y             | y <sup>++</sup> | # |
|---|---------------|-----------------|------|---------------|-----------------|---|
| 1 | 114.09        | 57.55           | L    |               |                 | 7 |
| 2 | <b>213.16</b> | 107.08          | V    | <b>749.39</b> | <b>375.20</b>   | 6 |
| 3 | <b>341.22</b> | 171.11          | Q    | <b>650.33</b> | <b>325.67</b>   | 5 |
| 4 | <b>488.29</b> | 244.65          | F    | <b>522.27</b> | 261.64          | 4 |
| 5 | <b>617.33</b> | 309.17          | E    | <b>375.20</b> | 188.10          | 3 |
| 6 | <b>688.37</b> | 344.69          | A    | <b>246.16</b> | 123.58          | 2 |
| 7 |               |                 | R    | <b>175.12</b> | 88.06           | 1 |

|      |         |              |
|------|---------|--------------|
| Rpc1 | YOR116C | LVRVDNSGCLVK |
|------|---------|--------------|

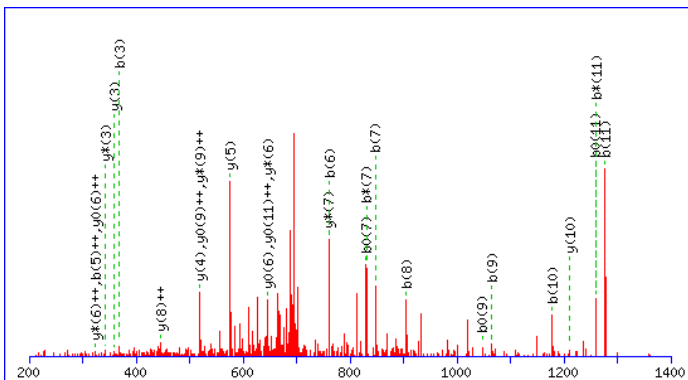

| #  | b              | b <sup>++</sup> | Seq. | y              | y <sup>++</sup> | #  |
|----|----------------|-----------------|------|----------------|-----------------|----|
| 1  | 114.09         | 57.55           | L    |                |                 | 12 |
| 2  | 213.16         | 107.08          | V    | 1310.65        | 655.83          | 11 |
| 3  | <b>369.26</b>  | 185.13          | R    | <b>1211.58</b> | 606.30          | 10 |
| 4  | 532.32         | 266.67          | Y    | 1055.48        | 528.25          | 9  |
| 5  | 647.35         | <b>324.18</b>   | D    | 892.42         | <b>446.71</b>   | 8  |
| 6  | <b>761.39</b>  | 381.20          | N    | 777.39         | 389.20          | 7  |
| 7  | <b>848.43</b>  | 424.72          | S    | 663.35         | 332.18          | 6  |
| 8  | <b>905.45</b>  | 453.23          | G    | <b>576.32</b>  | 288.66          | 5  |
| 9  | <b>1065.48</b> | 533.24          | C    | <b>519.30</b>  | 260.15          | 4  |
| 10 | <b>1178.56</b> | 589.78          | L    | <b>359.27</b>  | 180.14          | 3  |
| 11 | <b>1277.63</b> | 639.32          | V    | 246.18         | 123.59          | 2  |
| 12 |                |                 | K    | 147.11         | 74.06           | 1  |

### Supplemental Figure S2

Annotated spectra for proteins identified on the basis of a single peptide.

| <i>Yeast standard name</i> | <i>Yeast systematic name</i> | <i>peptide</i>      |
|----------------------------|------------------------------|---------------------|
| Rpb6                       | YPR187W                      | TIVTGGNGPEDFQQHEQIR |

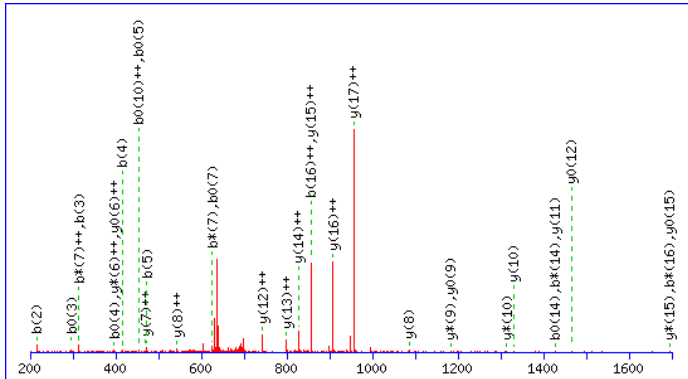

| #  | b       | b <sup>++</sup> | Seq. | y       | y <sup>++</sup> | #  |
|----|---------|-----------------|------|---------|-----------------|----|
| 1  | 102.06  | 51.53           | T    |         |                 | 19 |
| 2  | 215.14  | 108.07          | I    | 2024.98 | 1012.99         | 18 |
| 3  | 314.21  | 157.61          | V    | 1911.89 | 956.45          | 17 |
| 4  | 415.26  | 208.13          | T    | 1812.83 | 906.92          | 16 |
| 5  | 472.28  | 236.64          | G    | 1711.78 | 856.39          | 15 |
| 6  | 529.30  | 265.15          | G    | 1654.76 | 827.88          | 14 |
| 7  | 643.34  | 322.17          | N    | 1597.74 | 799.37          | 13 |
| 8  | 700.36  | 350.68          | G    | 1483.69 | 742.35          | 12 |
| 9  | 797.42  | 399.21          | P    | 1426.67 | 713.84          | 11 |
| 10 | 926.46  | 463.73          | E    | 1329.62 | 665.31          | 10 |
| 11 | 1041.48 | 521.25          | D    | 1200.58 | 600.79          | 9  |
| 12 | 1188.55 | 594.78          | F    | 1085.55 | 543.28          | 8  |
| 13 | 1316.61 | 658.81          | Q    | 938.48  | 469.74          | 7  |
| 14 | 1444.67 | 722.84          | Q    | 810.42  | 405.71          | 6  |
| 15 | 1581.73 | 791.37          | H    | 682.36  | 341.69          | 5  |
| 16 | 1710.77 | 855.89          | E    | 545.30  | 273.16          | 4  |
| 17 | 1838.83 | 919.92          | Q    | 416.26  | 208.63          | 3  |
| 18 | 1951.91 | 976.46          | I    | 288.20  | 144.61          | 2  |
| 19 |         |                 | R    | 175.12  | 88.06           | 1  |



**Supplemental Figure S3**

Representative silver-stained gels of the CCT5-, PIH1D1-, RUVBL2-, RPAP4/GPN1-, POLR2A/RPB1-TAP eluates. A typical non-induced eluate is also shown. The position of molecular weight markers is indicated. Arrows indicate the position of the bait.

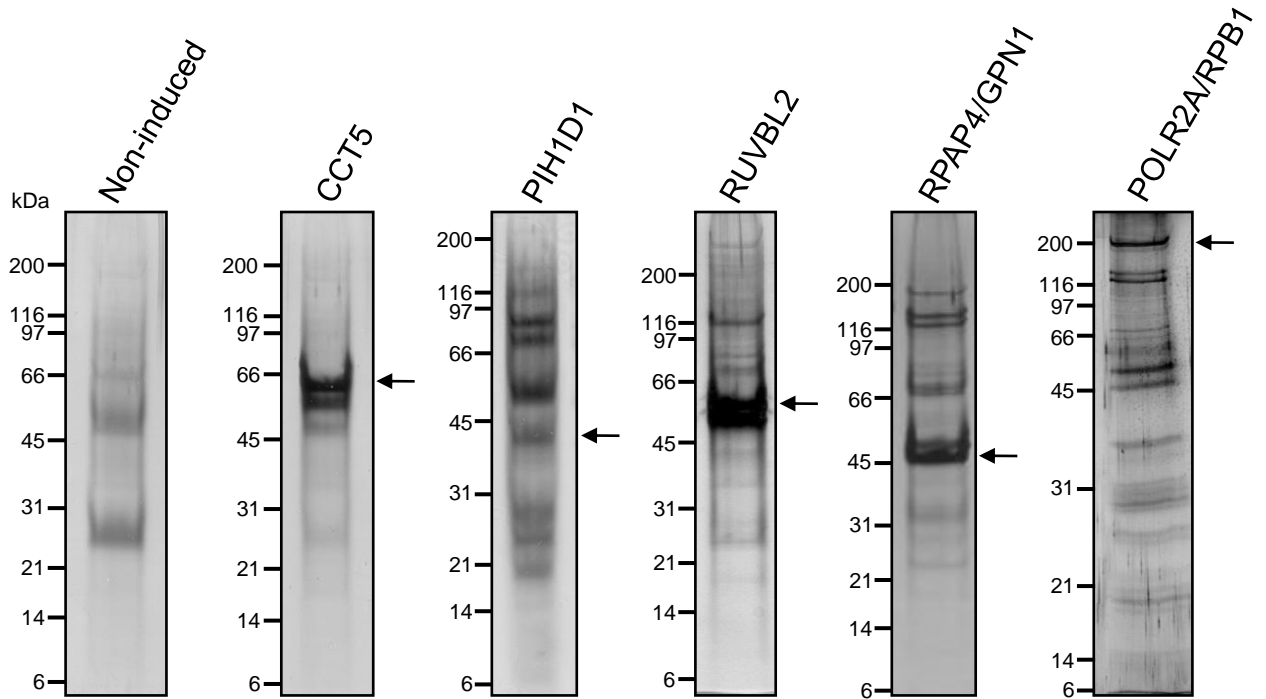

**Supplemental Figure S4**

Representative images of immunofluorescence experiments showing the intracellular localization of POLR2A/RPB1, POLR2B/RPB2, POLR2C/RPB3 and POLR2F/RPB6 following treatment with RPAP4 and control siRNA, leptomycin B (LMB) and benomyl. In each case, the location of DNA is shown (TO-PRO<sup>®</sup>-3 iodide). An anti-FLAG antibody was used to localize FLAG-POLR2B,C and F. In this figure, endogenous POLR2A was localized using the 8WG16 antibody (the location of FLAG-POLR2A is identical (not shown)).

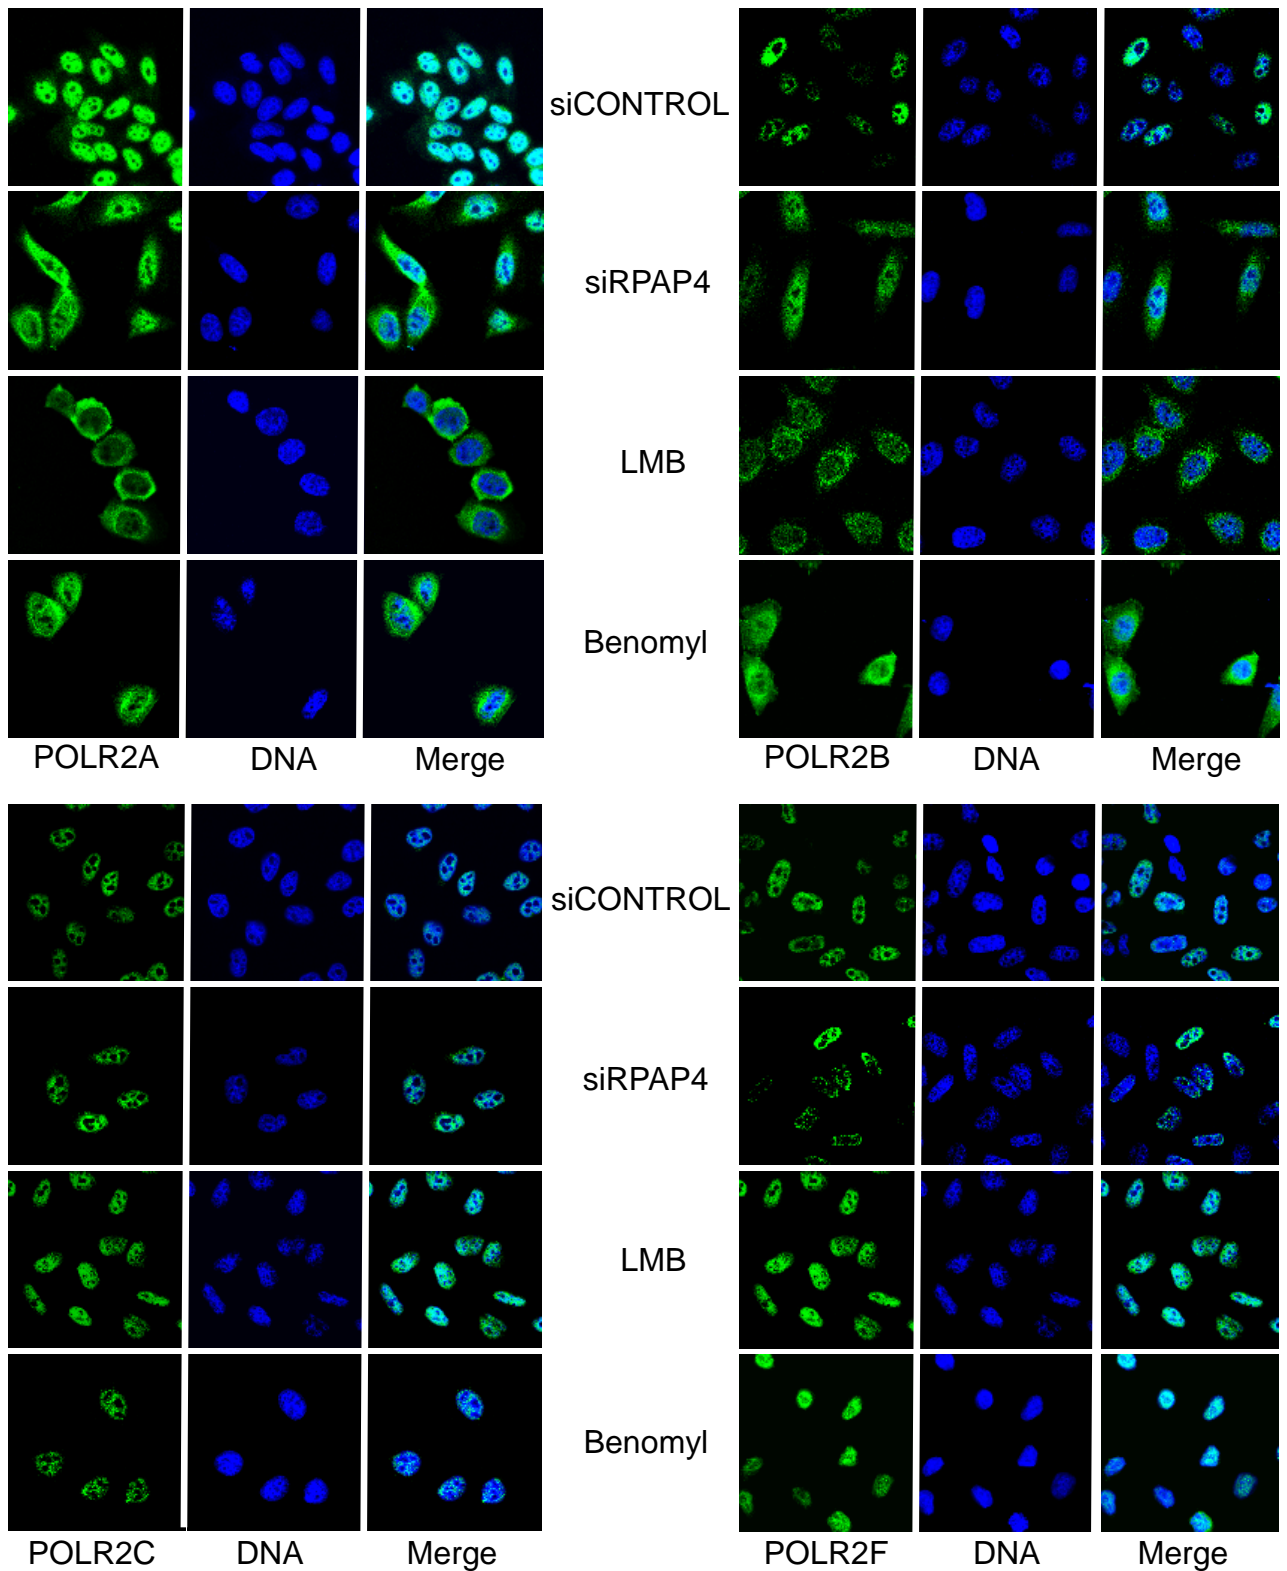

Supplement: supp_M110.003616_mcp.M110.003616-1.pdf [file supp_M110.003616_mcp.M110.003616-1.pdf]
